1    **Structural and Functional Responses of Soil Microbial Communities to Biodegradable**  
2    **Plastic Film Mulching in Two Agroecosystems**

3    Sreejata Bandopadhyay<sup>a</sup>, Henry Y. Sintim<sup>b</sup> and Jennifer M. DeBruyn<sup>a\*</sup>

4    <sup>a</sup>Department of Biosystems Engineering and Soil Science, University of Tennessee, Knoxville,  
5    TN 37996

6    <sup>b</sup>Department of Crop & Soil Sciences, Washington State University, Pullman, WA 99164 and  
7    Puyallup, WA 98374

8    \*Corresponding author

9    Jennifer DeBruyn, Department of Biosystems Engineering and Soil Science, University of  
10    Tennessee, 2506 E.J. Chapman Drive, Knoxville, TN 37996, USA.

11    Email: [jdebruyn@utk.edu](mailto:jdebruyn@utk.edu).

12

13

14

15

16

17

18 **Abstract:**

19 Polyethylene (PE) plastic mulch films are used globally in crop production but incur considerable  
20 disposal and environmental pollution issues. Biodegradable plastic mulch films (BDMs), an  
21 alternative to PE-based films, are designed to be tilled into the soil where they are expected to be  
22 mineralized to carbon dioxide, water and microbial biomass. However inadequate research  
23 regarding the impacts of repeated incorporation of BDMs on soil microbial communities has partly  
24 contributed to limited adoption of BDMs. In this study, we evaluated the effects of BDM  
25 incorporation on soil microbial community structure and function over two years in two  
26 geographical locations: Knoxville, TN, and in Mount Vernon, WA. Treatments included four  
27 plastic BDMs, a completely biodegradable cellulose mulch, a non-biodegradable PE mulch and a  
28 no mulch plot. Bacterial community structure determined using 16S rRNA amplicon sequencing  
29 revealed significant differences by location and season. Differences in bacterial communities by  
30 mulch treatment were not significant for any season in either location, except for Fall 2015 in WA  
31 where differences were observed between BDMs and no-mulch plots. Extracellular enzyme rate  
32 assays were used to characterize communities functionally, revealing significant differences by  
33 location and sampling season in both TN and WA but minimal differences between BDMs and PE  
34 treatments. Limited effects of BDM incorporation on soil bacterial community structure and soil  
35 enzyme activities when compared to PE suggest that BDMs have comparable influences on soil  
36 microbial communities, and therefore could be considered an alternative to PE.

37 **Importance**

38 Plastic film mulches increase crop yields and improve fruit quality. Most plastic mulches are made  
39 of polyethylene (PE), which is poorly degradable, resulting in undesirable end-of-life outcomes.  
40 Biodegradable mulches (BDMs) may be a sustainable alternative to PE. BDMs are made of

41 polymers which can be degraded by soil microbial enzymes, and are meant to be tilled into soil  
42 after use. However, uncertainty about impacts of tilled-in BDMs on soil health has restricted  
43 adoption of BDMs. Our previous research showed BDMs did not have a major effect on a wide  
44 range of soil quality indicators (Sintim et al. 2019); here we focus on soil microbial communities,  
45 showing that BDMs do not have detectable effects on soil microbial communities and their  
46 functions, at least over the short term. This informs growers and regulators about use of BDMs in  
47 crop production, paving a way for an agricultural practice that reduces environmental plastic  
48 pollution.

## 49 **1. Introduction**

50 Plastic mulch films are widely used in crop production systems to improve soil microclimate and  
51 suppress weeds, translating into increased crop yields and/or improved fruit quality. Some of the  
52 agronomic benefits of using plastic mulch films include reduction of weed pressure (1),  
53 conservation of soil moisture (2, 3), and moderation of soil temperature, among others. Low  
54 density polyethylene (PE) mulch has traditionally been favored by growers due to its many  
55 attractive properties such as easy processability, high durability, flexibility etc. (4, 5). However,  
56 PE does not readily biodegrade, and thus must be disposed at the end of the growing season,  
57 contributing to our global plastic waste problem (6, 7). Even when removed from a field, fragments  
58 of film are left behind in the soil, which can affect soil function and soil biota (8-13) or leach out  
59 into water systems and pollute aquatic ecosystems (14-19). As these plastics break down in soil,  
60 they form microplastics (20), contributing to terrestrial microplastic pollution (13, 20).

61 Plastic mulch use is expected to increase to meet increasing global food demands; therefore, it is  
62 imperative to find alternatives that will reduce the environmental footprint. Biodegradable mulch  
63 films (BDMs) are a potential alternative: BDMs are made of polymers that can be degraded by

64 microbial action (21-24). In the field, BDMs perform like other plastic films by altering the soil  
65 microclimate and improving crop yields (25). However, unlike PE plastics, which require removal  
66 and disposal, BDMs are designed to be tilled into the soil where resident soil microbes are expected  
67 to degrade them over time. Under ideal circumstances, they should eventually be mineralized into  
68 carbon dioxide and water.

69 Despite being a promising sustainable alternative, adoption of BDMs has been limited (26).  
70 Currently available BDMs are not certified for use in organic crop production in North America  
71 as they are not 100% bio-based (27). Regulators are hesitant to allow these products until there is  
72 convincing evidence that they are safe for soil ecosystems. Thus, evaluating the impacts of  
73 incorporation of BDMs into soil on soil health is a critical part of adoption and policy development  
74 surrounding BDMs (28).

75 BDMs can impact soil health in two ways: indirectly, in a manner similar to PE films, by acting  
76 as a surface barrier to soil and modifying the soil microclimate, and directly, by addition of  
77 physical fragments and mulch carbon into soil after tillage (5). The body of research on the impacts  
78 of polyethylene films on soil microbial communities and functions can help us predict the indirect  
79 effect of BDMs on soil health. However, research on the direct effects of BDMs on soil microbial  
80 community structure and function remains poorly answered due to a dearth of research that directly  
81 compares BDMs and PE in the same study. Unless there is a direct comparison of BDMs and PE,  
82 it is difficult to tease apart whether the observed changes are above and beyond what you would  
83 expect from the application of PE mulch to the soil surface (5). These answers are critical if  
84 widespread use of BDMs is to be advocated. Previous studies have analyzed impacts of BDMs on  
85 soil microbial communities using PLFA profiling (29) and pyrosequencing (30) methods.

86 However, these studies did not use PE as a negative control so effects of BDM tilling on soil  
87 microbial community structure and function remain uncertain.

88 In this study, we evaluated the impacts of BDM use on soil microbial communities by directly  
89 comparing to PE mulch in a two-year vegetable crop field trial in two diverse climates (Knoxville,  
90 TN, in the southeastern USA and Mount Vernon, WA, in the northwestern USA). During this field  
91 trial, measurement of a suite of soil physiochemical properties and calculation of soil health indices  
92 revealed that the overall effect of mulching on soil health was minimal and that BDMs performed  
93 comparably to PE (31). The study by Sintim et al. (31) showed that the effect of location, time and  
94 their interactions were greater compared to the effects of mulch treatments. To build on this  
95 finding, we focused on biological soil health, evaluating the impacts of BDMs on 1) soil microbial  
96 community structure, characterized using 16S rRNA gene amplicon sequencing 2) soil microbial  
97 abundances, estimated using qPCR and 3) soil microbial community function, estimated by a suite  
98 of soil extracellular enzyme rates over the two-year field trial experiment. We tested the  
99 hypotheses that plastic mulches would significantly alter soil microbial community structure and  
100 function, but that there would be no significant differences between PE and BDM mulches.

## 101 **2. Materials and methods**

### 102 *2.1 Plastic Mulch Films*

103 Three commercially available biodegradable mulch films (BioAgri®, Naturecycle, Organix A.G.  
104 Film™,) and one experimental film comprised of a blend of polylactic acid (PLA) and  
105 polyhydroxyalkanoates (PHA) were tested alongside a polyethylene (PE) mulch (negative  
106 control), and cellulose mulch (WeedGuard Plus®, positive control). Physicochemical properties  
107 of mulches are reported in Table 1.

### 108 *2.2 Field trial description*

109 The mulches were tested in the field over two years (2015 to 2016) under pie pumpkin (*Cucurbita*  
110 *pepo*) as a test crop, with full experimental details described in Sintim et al. (31) and S. Ghimire  
111 et al. (32). Field experimental stations were set up in two locations: East Tennessee Research and  
112 Education Center (ETREC), University of Tennessee, Knoxville, TN and the Northwestern  
113 Washington Research & Extension Center (NWREC), Washington State University, Mount  
114 Vernon, WA. The soil at Knoxville is a sandy loam (59.9% sand, 23.5% silt, and 16.6% clay),  
115 classified as a fine kaolinitic thermic Typic Paleudults. The soil at Mount Vernon is a silt loam  
116 (14.2% sand, 69.8% silt, and 16% clay), classified as a fine-silty mixed nonacid mesic Typic  
117 Fluvaquents. Henceforth in the paper, Knoxville will be referred to as TN and Mount Vernon will  
118 be referred to as WA.

119 Each field site was arranged as a randomized complete block design with four replications of seven  
120 main plot treatments (six mulch treatments and one no mulch control). Before mulch application  
121 began in TN and WA, the plots were under winter wheat (*Triticum aestivum*) cover crop in TN  
122 and clover (*Trifolium spp.*) at WA. Mulches were machine-laid on raised beds. Pumpkins  
123 (*Cucurbita pepo*) were grown during the growing season. The PE mulch was removed after  
124 pumpkin harvest, while the BDMs were tilled into the soil with a rototiller.

125 Soil water content and temperature were monitored as described in Sintim et al. (31). Briefly,  
126 sensors (5TM, Decagon Devices Inc., Pullman, WA) installed in the center of each mulch  
127 treatment at 10-cm and 20-cm soil depths for one field block were connected to data loggers  
128 (EM50G, Decagon Devices Inc., Pullman, WA) that recorded the soil water and temperature data  
129 hourly. Soil water content and temperature data is reported in Sintim et al. (31). Air temperature,  
130 precipitation, relative humidity, wind, and solar radiation were collected from a meteorological  
131 station located at the field site at TN (Decagon Devices Inc. Weather Station, Pullman, WA), and

132 about 100 m away from the field site at WA (WSU AgWeatherNet Station, Mount Vernon, WA).  
133 Weather data for the two locations for 2015-2017 are reported in Table S1.  
134 Soil physical, chemical, and biological properties were assessed over the two-year study for this  
135 site, in order to assess changes in soil health. Detailed protocols for these measurements and raw  
136 data is provided in Sintim et al. (31).

### 137 *2.3 Soil sampling*

138 Soil samples were collected from each of the 28 plots (7 treatments, replicated 4 times) at both  
139 locations in the Spring (May) and Fall (September) of 2015 and 2016. Soil was collected from the  
140 top 10 cm, using a 2 cm diameter stainless steel auger. Thirty 10-cm soil cores were taken and  
141 composited for each of the plots. All sampling equipment was cleaned with 70% ethanol before  
142 and in between plots to limit cross contamination. Roots and pebbles were removed by hand, and  
143 soils homogenized and stored in plastic bags for transport back to the lab. Soils were stored at -80  
144 °C until DNA extraction and extracellular enzyme assays.

### 145 *2.4 Soil DNA extraction and quantification*

146 Extraction of DNA from soil samples was completed using the MoBio™ PowerLyzer™ Power  
147 Soil DNA isolation kit (now branded under Qiagen™) with inhibitor removal technology, as per  
148 manufacturer's instructions. 0.25 grams of soil were used for the extractions, and the DNA  
149 obtained after the final elution step was stored at -20 °C until further analyses.

150 Quantification of the DNA extracted from soil was completed using the Quant-It™ PicoGreen™  
151 dsDNA Quantification Kit (ThermoFisher Scientific) per manufacturer's instructions. Standard  
152 curves generated had R squared values of 1. Mean DNA concentration of the soil samples was 13  
153 ng  $\mu\text{l}^{-1}$  DNA.

154 *2.5 Quantitative PCR for bacterial and fungal abundances*

155 As a proxy for bacterial and fungal abundances, 16S rRNA (bacteria) and ITS (fungi) gene copy  
156 abundances were quantified from soil DNA samples using Femto™ Bacterial DNA quantification  
157 kit (Zymo Research) and Femto™ Fungal DNA quantification kit (Zymo Research) following the  
158 manufacturer's protocol. DNA extracts were diluted 1:10 prior to quantification and 1 µl of the  
159 diluted samples was used for each qPCR reaction. All samples were analyzed in triplicate. No  
160 template negative controls were included in each run. Bacterial and fungal DNA standards were  
161 provided in the kit and the ng DNA standard per well was converted to copy numbers which were  
162 used for final calculations. qPCR reactions were performed in a CFX Connect Real-Time PCR  
163 Detection System (BioRad). qPCR efficiencies averaged around 85% and 90% for bacterial and  
164 fungal assays, respectively. Standard curves had R squared values ranging from 0.98 to 1.

165 *2.6 DNA amplification and sequencing*

166 16S rRNA amplicon sequencing of DNA extracts was conducted by the Genomic Services  
167 Laboratory (GSL) at Hudson Alpha, Huntsville, AL, following their standard operating  
168 procedures. Extracted DNA samples were shipped frozen in 96 well plates. The V4 region of the  
169 16S rRNA gene was amplified using primers 515F (GTGCCAAGCAGCCGCGGTAA) and 806R  
170 (GGACTACHVGGGTWTCTAAT) (33). The first PCR was run with V4 amplicon primers, Kapa  
171 HiFi master mix, and 20 cycles of PCR. All aliquots and dilutions of the samples were completed  
172 using the Biomek liquid handler. PCR products were purified and were stored at -20°C until further  
173 processing was completed. The PCR indexing was later completed for the 16S (V4) amplicon  
174 batch. Products were indexed using GSL3.7/PE1 primers, Kapa HiFi master mix, and 12 cycles of  
175 PCR. Products were purified using magnetic beads using the Biomek liquid handler. Final libraries  
176 were quantified using Pico Green. V4 amplicon size obtained was 425 bp for the soil samples. The



177 amplified 16S rRNA genes were sequenced using 250 paired-end reads on an Illumina MiSeq  
178 platform. Sequence reads are deposited in the NCBI sequence read archive (Accession  
179 XXXXXX).

180 Raw sequence data was processed using mothur v.1.39.5 following the MiSeq SOP (34)  
181 (Supplemental File 1). Before aligning to the reference database (SILVA release 102), unique  
182 sequences were identified, and a count table generated. After alignment to SILVA database,  
183 sequences were filtered to remove overhangs at both ends, and sequences de-noised by pre-  
184 clustering sequences with up to two nucleotide differences. Chimeras were removed using the  
185 VSEARCH algorithm. All sequences including 18S rRNA gene fragments and 16S rRNA from  
186 Archaea, chloroplasts, and mitochondria were classified using the Bayesian classifier (35) against  
187 the mothur-formatted version of the RDP PDS training set (v.9) with a bootstrap value of > 80%  
188 (35). Following this step, untargeted (i.e. non-bacterial) sequences classified as *Eukaryota* and  
189 *Archaeota* were removed. Sequences were finally binned into phylotypes according to their  
190 taxonomic classification at the genus level. A consensus taxonomy for each OTU was generated  
191 by comparison to the RDP training set. The resulting OTU count table and taxonomy assignments  
192 were imported into R (v. 3.4.0) (36) for further downstream statistical analyses. Mothur code, R  
193 code and associated input files are available at: <https://github.com/jdebruyne/BDM-Microbiology>.

#### 194 *2.7 Extracellular enzyme assays*

195 Fluorescence microplate enzyme assays were conducted using fluorescently labelled substrates to  
196 assess enzyme activities in soil (37). Seven enzymes were assayed using their respective  
197 fluorescent substrates and standards (Table 2).

218 Soil slurries were prepared in a sodium acetate trihydrate buffer whose pH was matched closely  
219 with the soil pH. 800  $\mu$ l of soil slurry was pipetted into deep well 96 well plates. Separate plates  
220 were prepared for MUB and MUC standard curves for each sample. 200  $\mu$ l of appropriate  
221 standards and substrates were added to the soil slurries. The plates were sealed and inverted to mix  
222 the contents. Incubation was done for 3 hours at room temperature, after which the substrate and  
223 standard plates were centrifuged at 1500 rpm ( $\sim$ 327 x g) for 3 min. The supernatants were pipetted  
224 into black 96 well plates and fluorescence measured at 365 nm excitation wavelength and 450 nm  
225 emission wavelength in a BioTek® Synergy plate reader.

## 226 *2.8 Statistical analyses*

227 Beta diversity was computed using Bray-Curtis distances of microbial community composition  
228 using the vegan package (v 2.4-3) in R version 3.4.0 (36) based on OTU tables, and were then  
229 visualized using non-metric multidimensional scaling (NMDS) using phyloseq package v.1.21.0  
230 in R (38). To determine whether significant differences existed in bacterial community  
231 composition between bacterial communities across different locations, seasons, and mulch  
232 treatments, a permutational multivariate analysis of variance (PERMANOVA) was performed  
233 using the ADONIS function implemented in R, based on the Bray-Curtis dissimilarity matrix. All  
234 libraries were scaled to even depth (minimum sample read count, i.e. smallest library size, of  
235 34,266) before analysis was performed. Similarity percentage analyses (SIMPER) was completed  
236 in R to reveal the most influential OTUs driving differences between soil bacterial communities  
237 in different locations, and across different seasons. Canonical analysis of principal coordinates  
238 (CAP) was done to relate environmental variables reported in Sintim et al. (31) to changes in  
239 bacterial community composition. The ordination axes were constrained to linear combinations of  
240 environmental variables, then the environmental scores were plotted onto the ordination. A

221 PERMANOVA was performed on the CAP axes. These analyses were completed in R following  
222 the online tutorial by Berry M (39).

223 Alpha diversity was computed by subsampling the libraries to the minimum number of reads  
224 (34,336). This was done with replacement to estimate species abundance of the real population by  
225 normalizing sampling effort. The subsampling was repeated 100 times and the diversity estimates  
226 from each trial were averaged. The `estimate_richness` function was used in R phyloseq package to  
227 calculate observed richness and inverse Simpson indices (for diversity). A mixed model analysis  
228 of variance was completed using the generalized linear mixed model (GLIMMIX) procedure in  
229 SAS V. 9.3 to assess changes in richness and inverse Simpson over time. The fixed effects were  
230 location (TN and WA), mulch treatments (7 treatments total) and date/season of soil sampling (4  
231 time points), while random effect was block (total 3 blocks to serve as replicates). Repeated  
232 measures were incorporated in the model as sampling was done over time, twice a year in Spring  
233 and Fall seasons in 2015 and 2016. The model was a completely randomized design (CRD) split-  
234 split-plot with repeated measures in the sub-sub plot. Normality of data was checked using  
235 Shapiro-Wilk test ( $W > 0.9$ ) and equal variance using Levene's test ( $\alpha = 0.05$ ). All data were  
236 normal and hence no transformations were performed. Raw experimental values and standard  
237 errors are reported in the figures.

238 To visualize differences in the functional profile of the communities; i.e. all seven enzyme rates),  
239 NMDS ordination of Bray-Curtis similarities was done in Primer 7 v. 7.0.13 (PRIMER-E). A  
240 mixed model analysis of variance with repeated measures was completed using the generalized  
241 linear mixed model (GLIMMIX) procedure in SAS V. 9.3 to assess changes in enzyme activities  
242 over time. Fixed and random effects were same as specified above. However, location as a class  
243 was not included in this model as PERMANOVA results from PRIMER-E were used to report

244 differences between locations. Boxplots for equal variance and outliers, reported in SAS, were  
245 used to remove outliers in the dataset. Normality was checked using Shapiro-Wilk test ( $W > 0.9$ )  
246 and probability plots for residuals, and equal variance using Levene's test ( $\alpha = 0.05$ ). Data were  
247 log transformed as necessary when these conditions were not met. Raw experimental values and  
248 standard errors are reported in the figures. All graphics were plotted using R. v. 3.4.0. Type III  
249 tests of fixed effects and interaction effects are reported.

250 To assess for potential enrichment of bacteria and fungi, a paired t-test was conducted using initial  
251 and final 16S and ITS gene copy abundances (determined by qPCR) from Spring 2015 and Fall  
252 2016 to see if there was a significant change. Initial 16S and ITS gene copy abundances from  
253 Spring 2015 were also subtracted from final abundances in Fall 2016 to get change in abundance  
254 over time. To determine if the enrichment or depletion of bacterial and fungal abundances was  
255 significantly different between treatments, a mixed model analysis of variance in SAS v. 9.3 using  
256 the GLIMMIX procedure was conducted on the differences. Significance level of all analyses were  
257 assessed at  $\alpha = 0.05$ . All data were checked for normality using Shapiro-Wilk test ( $W > 0.9$ ).

### 258 **3. Results**

#### 259 *3.1 Environmental and soil physicochemical data*

260 Environmental data collected during the experiment is reported in Sintim et al. (31) and in Table  
261 S1. The mean daily air temperature in Knoxville, TN during experimental years of 2015 to 2016  
262 was about 4 °C higher than in Mount Vernon, WA (Table S1). The total annual precipitation during  
263 the experimental years was higher in Knoxville, TN than in Mount Vernon, WA.

264 Soil temperature, moisture and physicochemical properties were measured and reported previously  
265 by Sintim et al. (31). In summary, significantly increased soil temperature was observed in the

266 early growing seasons in the plastic mulch plots compared to the cellulose and no-mulch plots. On  
267 average, the monthly soil temperature was greater in TN than in WA. The soil water content varied  
268 more among the mulch treatments, with PE mulch having the highest soil water content for the  
269 greatest period of time. Mulched plots generally had higher water content than the no mulch plots.  
270 The soil health analysis revealed some effects of mulching on certain properties (namely aggregate  
271 stability, infiltration, soil pH, electrical conductivity, nitrate, and exchangeable potassium), but  
272 these were not consistent among BDMs, nor across sampling times and locations.

### 273 *3.2 Soil bacterial community diversity and structure*

274 The NMDS ordination revealed a clear difference in community structure between TN and WA  
275 when combining data from all four sampling seasons (Spring 2015 to Fall 2016) (Fig 1a).  
276 Permutational ANOVA (PERMANOVA) tests confirmed significant differences between TN and  
277 WA soil microbial communities (Table 3, Table S2). The mean relative abundances of the most  
278 abundant classes of bacteria are shown in Fig 1b. Similarity percentage tests (SIMPER) revealed  
279 the most influential OTUs contributing to the variation seen between location (Fig 1b). The most  
280 influential OTUs belonged to several classes of microbes such as *Acidobacteria\_Gp7*,  
281 *Acidobacteria\_Gp16*, *Acidobacteria\_Gp4*, *Planctomycetacia* and *Spartobacteria*. CAP analysis  
282 revealed that the differences in soil communities between TN and WA were most related to pH,  
283 soil moisture and organic matter content: the communities in TN were related to increased pH,  
284 whereas moisture and organic matter were positively related to communities in WA (Fig S1).

285 In addition to locational differences, bacterial communities also differed significantly between the  
286 different seasons (Table 3, Table S2). For both locations, Spring communities were more similar  
287 to each other than Fall communities (Fig 2a, b). SIMPER tests revealed that several genera of  
288 *Acidobacteria*, *Planctomycetaceae*, *Spartobacteria* and *Actinobacteria* (such as *Streptomyces sp.*)

289 were cumulatively responsible for 60% of the seasonal variance in bacterial communities (Fig S2  
290 and S3). Interestingly, *Streptomyces spp.* increased in percent relative abundance over time from  
291 Spring 2015 to Fall 2016 in both TN and WA (Fig S2).

292 Unlike location and season, the mulch treatments did not have a significant effect on bacterial  
293 community structure (Fig 2). Because of the locational and seasonal differences, we additionally  
294 analyzed each time-location set separately, and did not detect any significant effects of treatment  
295 on community structure (Fig S4, Table 3, Table S2).

296 Alpha diversity of the soil bacterial communities was estimated using observed species richness  
297 and inverse Simpson index of diversity (Table S3). The observed species richness estimator  
298 measures count of unique OTUs in each sample. There were significant differences between TN  
299 and WA ( $p < 0.05$ ) in richness estimates (Table 4, Fig 3a). TN had greater richness than WA  
300 throughout the experiment, ranging from 260 to 300 unique OTUs. WA richness estimates ranged  
301 from 250 to 280 OTUs over the two years. The locational differences in richness were due to a  
302 lower richness in Fall 2015, Spring 2016 and Fall 2016 in WA (Fig 3). The Inverse Simpson  
303 diversity index ranges were similar between TN and WA, ranging from 7 to 11.

304 For both TN and WA, there was a significant difference between seasons in both richness and  
305 inverse Simpson index (Table 4). The richness estimates in TN significantly differed between 2015  
306 and 2016 (Fig 3a). In WA, Fall 2015 differed in richness from the other time points. In TN, Fall  
307 2016 diversity was significantly higher than other seasons. Diversity estimates were significantly  
308 lower in Spring than in the Fall seasons for WA (Fig 3b).

309 In TN, PE had the lowest richness and BioAgri had the highest, however, treatment differences in  
310 richness estimates were not significant (Table 4) when analyzing data using a mixed model.

311 Inverse Simpson diversity indices were also not significantly different between treatments (Table  
312 4). Looking at the final time point in TN, diversity estimates were highest for Weedguard, and  
313 lowest for PE, and in WA, the estimates were highest for Weedguard, followed by PE with BDMs  
314 having lower diversity than PE or Weedguard, however these differences were not significant (Fig  
315 3b).

### 316 *3.3 Microbial community abundances*

317 As a proxy for bacterial and fungal abundances, bacterial (16S) and fungal (ITS) rRNA gene copies  
318 were quantified using qPCR assays for soil samples from all seasons. In order to assess if gene  
319 abundances had significantly changed over the course of the experiment (Spring 2015 to Fall 2016)  
320 for each mulch treatment, a paired t-test was used to identify differences significantly different  
321 from zero (Table 5). There was a significant increase in bacterial gene copies under BDM and  
322 Weedguard treatments in WA, but no significant change for no mulch and PE treatments (Table  
323 5). There was also a significant enrichment in fungal gene copies over time for two of the BDMs  
324 (PLA/PHA and Naturecycle) in WA. In TN, significant enrichment in bacterial gene copies was  
325 seen under Organix, PLA+PLA and PE treatments (Table 5) but no enrichment was seen in fungal  
326 gene copies. In order to determine if these changes were significantly different between treatments,  
327 the differences between the final (Fall 2016) and the initial (Spring 2015) abundances were  
328 analyzed using a mixed model analysis of variance in SAS v 9.3 and Tukey post hoc tests. In both  
329 locations, mulch treatments did not have a significant effect on the changes in either 16S or ITS  
330 gene copies over the course of the experiment (Fig 4a, b).

### 331 *3.4 Microbial community functions*

332 To assess potential functional responses of the soil microbial communities, extracellular enzyme  
333 potential rate assays were conducted for common carbon, nitrogen, and phosphorus cycling  
334 enzymes in soil (Table 2). The data were combined over the two years to visualize Bray Curtis  
335 similarities of the enzyme rate profiles (Fig 5). Locational differences in the enzyme profile were  
336 significant ( $p < 0.05$ ), as were seasonal differences in both TN ( $p < 0.05$ ) and WA ( $p < 0.05$ )  
337 evaluated using PERMANOVA (Fig 5). However, mulch treatment did not have a significant  
338 effect on the enzyme profile for any of the seasons at either location ( $p < 0.05$ ). NMDS ordination  
339 for the final sampling time point Spring 2017 is shown in Fig S5, showing no clear treatment  
340 differences.

341 In general, the enzyme activity rates oscillated between higher activities in the Spring and lower  
342 activities in the Fall. When analyzed separately for each enzyme, the data over the two years  
343 revealed a significant effect of sampling time in TN for all seven enzymes assayed. In WA, enzyme  
344 activities of  $\beta$ -xylosidase,  $\beta$ -glucosidase,  $\alpha$ -glucosidase, N-acetyl  $\beta$  glucosaminidase and  
345 phosphatase were significantly different between sampling times (Fig 6). In WA, cellobiosidase  
346 and leucine amino peptidase activities remained unchanged across the seasons (10-22 nmol  
347 activity  $g^{-1}$  dry soil  $h^{-1}$  for cellobiosidase and 200-375 nmol activity  $g^{-1}$  dry soil  $h^{-1}$  for leucine  
348 amino peptidase) (Fig 6).

349 When averaged across seasons, mulch treatment differences were not significant for any soil  
350 enzymes in WA (Table 6). However, in TN, an effect of mulch treatment was observed for N-  
351 acetyl  $\beta$  glucosaminidase activities (Table 6). N-acetyl  $\beta$  glucosaminidase activity was reduced  
352 under BDMs and PE compared to no mulch plots. Interaction effects of mulch treatment and time  
353 of sampling were not detectable for any of the enzymes assayed in TN or WA (Table 6).

#### 354 4. Discussion



355 Characterizing the soil microbial communities under the different biodegradable mulches and non-  
356 biodegradable PE mulch revealed no significant effect of mulch type on bacterial community  
357 structure. This is in contrast to other studies that have reported altered bacterial communities in  
358 soils under BDMs (29, 40, 41), and under non-biodegradable plastic mulches (42, 43). Such  
359 opposite findings could be due to differences in methodology: for example, the studies by  
360 Koitabashi et al. (40) and Muroi et al. (41) were shorter laboratory incubation studies in controlled  
361 conditions (28 to 30°C), used pure polymer feedstock (rather than commercial film formulations  
362 which include plasticizers and other additives) and relied on detection methods such as polymerase  
363 chain reaction-denaturing gradient gel electrophoresis (PCR-DGGE). Laboratory studies under  
364 controlled conditions often result in more rapid microbial responses to treatments as opposed to  
365 field studies where variable environments introduces more noise. Our lack of observed difference  
366 may also be because of a realistic, but low, plastic to soil ratio: for example, Muroi et al. (41) used  
367 soil burial studies with an artificially high 1.8 g PBAT films in 300 g soil with added 30 ml of  
368 basal medium. Finally, our aim was to characterize responses in bulk soil communities to  
369 understand the overall system level response to plastic films, so we likely missed changes  
370 happening on smaller spatial scales. For example, Li et al. (29) reported changes in microbial  
371 communities in soils that were sampled in close proximity to buried mulch films, indicating that  
372 microbial communities in the immediate vicinity of the films may be affected. Here we show that  
373 any local effects of mulch films are not detectable at a plot/field scale, at least over a 2-year period.

374 We did note significant differences in soil bacterial composition by location and season, which has  
375 been observed in other studies (29, 30), confirming that mulch effects are minimal compared to  
376 other drivers of community structure variation. It is well accepted that local soil conditions such  
377 as temperature, moisture and pH play a pivotal role in shaping microbial communities (30, 44, 45).

378 In this study, the location differences in communities were attributed to higher relative abundances  
379 of *Acidobacteria*, *Actinobacteria* and *Planctomycetes* in TN and higher abundances of  $\beta$ - and  $\gamma$ -  
380 *Proteobacteria* in WA. This corresponds with higher pH and saturated K in TN and higher soil  
381 organic matter and soil moisture in WA. Both pH and water content are major edaphic factors that  
382 influence temporal and spatial variation in soil microbial communities (44, 46). Changes in soil  
383 physicochemical properties and different climates and soil types between TN and WA could  
384 explain such locational differences. Seasonal differences in communities were driven by  
385 significantly increased percent relative abundance of *Acidobacter Gp6*, *Gp4* and *Gp7* in Spring in  
386 TN as compared to Fall. Additionally, significantly greater abundances of *Planctomycetaceae* and  
387 *Streptomyces* were seen in Fall compared to Spring in TN. In WA, *Acidobacteria\_Gp6* and  
388 *Spartobacteria* showed significantly greater percent abundances in Spring compared to Fall  
389 whereas *Streptomyces sp.* showed significantly higher percent abundance in Fall compared to  
390 Spring (Fig S2). Seasonal tillage operations often reset many of the soil properties which can  
391 explain why the abundances of some taxa oscillated between Spring and Fall. *Streptomyces sp.*  
392 belongs to class Actinobacteria and have demonstrated polymer degrading capabilities (47).  
393 However, because we did not observe differences in the relative abundance of this taxa between  
394 BDMs, PE or no mulch control, this increase is likely attributable to the agronomic management  
395 of the plots (e.g. plant species, irrigation or fertilizer regimes etc.).

396 Richness estimates showed significant differences across locations and seasons in TN and WA.  
397 Diversity estimates were only significantly different between seasons, but not location. Mulch  
398 materials did not have a consistent impact on bacterial richness or diversity. A previous study  
399 evaluating microbial diversity using PCR-DGGE showed no difference in ammonia oxidizer  
400 diversity under biodegradable and non-biodegradable mulching materials one year after tilling

401 plastics into soil (48). The higher richness estimates under BDMs compared to PE treatments,  
402 which was significant in Fall 2015 in WA, suggested that tilled BDMs may help promote richness  
403 in the soil environment. Increased warming potential under PE mulch could also contribute to  
404 suppression of microbial activity which may also have impacts on community richness or  
405 diversity.

406 Gene copy abundances in soils were used as a proxy for bacterial and fungal abundances. In WA  
407 we observed an enrichment of both bacteria and fungi under BDM and Weedguard treatments over  
408 the course of the two-year experiment. In TN, we observed bacterial, but no fungal, enrichment in  
409 two of the four BDM plots and PE plot. A mixed model analysis of changes over the course of the  
410 experiment was not able to detect significant differences between treatments. It should be noted  
411 that enrichment was observed under BDM but not the PE plots in WA, suggesting that this is  
412 response to the incorporation of BDMs into the soil (as opposed to an indirect effect of  
413 microclimate modification, such as soil warming). Previous studies have also demonstrated  
414 increased fungal abundances in soil because of BDM incorporation (29, 41, 49, 50). Fungi have  
415 been observed to be important colonizers and degraders of BDMs (30, 40, 41). Tilled into soil,  
416 BDMs are a very small input of carbon when taking into account the volume of soil into which  
417 they are incorporated (5). For comparison, the input of mulch carbon added to the soil in this study  
418 was a significantly smaller amount (6-25 g C m<sup>-2</sup>) (51) compared to the amount added from cover  
419 crop residues (142 g C m<sup>-2</sup>) (52). However, the growth of soil microbes in agricultural soil is  
420 usually carbon-limited and several studies have demonstrated responses by soil microbes to these  
421 small inputs (5).

422 There is also precedent for the differential responses in microbial enrichment we observed between  
423 the two locations, with both fungal and bacterial enrichment in WA, but only bacterial enrichment

424 in TN. In a similar study comparing BDM effects in three locations, it was found that BDMs  
425 resulted in soil fungal enrichment in Texas and bacterial enrichment in TN (29). In one study, soil  
426 pH was shown to be the best predictor of bacterial community composition across different land  
427 use types, while fungal communities were shown to be most closely associated with changes in  
428 soil nutrient status such as extractable P concentrations and C:N ratios (53). Both TN and WA  
429 soils had comparable fungal gene abundances initially in the Spring of 2015. However, since the  
430 microbial communities in WA were seen to be controlled by the presence of organic matter (Fig  
431 S1) and WA soils had higher C:N ratios than TN soils this could have contributed to a fungal  
432 enrichment in WA but not in TN.

433 Enzyme assays were conducted to assess potential activity rates for common carbon, nitrogen and  
434 phosphorus cycling enzymes in soil. As with bacterial community structure, enzyme activity  
435 profiles showed the greatest differences by location and season (Fig 5, Table 6). The seasonal  
436 oscillation in enzyme activities seen for almost all the enzymes could be attributed to seasonal  
437 tillage operations which tend to offset many of the soil biological functions (54-56) (Fig 6). This  
438 was also observed for many of the soil physicochemical properties (31). Mulch treatments had  
439 significant effects on N- acetyl- $\beta$  -glucosaminidase (NAG) in TN. NAG was decreased under  
440 mulches compared to no mulch treatments, with the greatest decrease observed under PE. NAG  
441 catalyzes the hydrolysis of chitin to form amino sugars which are major sources of mineralizable  
442 nitrogen in soils and thus is important in carbon and nitrogen cycling in soils. Xylosidase activity  
443 was also reduced under mulch treatments compared to no mulch plots in TN though not significant.  
444 Because we saw decreases under all mulch treatments for NAG in TN, this is likely an indirect  
445 effect of the mulches via microclimate modification, rather than a direct effect of mulch fragments  
446 tilled into the soil. All mulches warm the soil, with PE often having a greater soil warming potential

447 compared to BDMs (2, 57). Mulches also increase soil moisture levels (58). Consequently, changes  
448 in soil temperature and moisture will affect enzyme pool sizes (59). The reduction in activity under  
449 plastic mulches may be because TN has a warmer climate where plastic mulches can push  
450 temperatures above optima limiting soil microbial activity (57). Mean soil temperatures in summer  
451 under mulched plots were 24.7 °C at 10 cm depth in TN, whereas in WA it was 18.7 °C. Un-  
452 mulched plots had mean summer soil temperatures of 23.8 °C for TN and 17.0 °C for WA (31). In  
453 the month of June in both years, soil temperatures exceeded 30 °C under mulched plots in TN, but  
454 were less than 30 °C for no mulch plots. It has been reported that fungal and bacterial growth rates  
455 have optimum temperatures around 25 to 30 °C in agricultural and forest humus soils, while at  
456 higher temperatures lower growth rates are found (60). This decrease in growth rate was shown to  
457 be more drastic for fungi than for bacteria, resulting in an increase in the ratio of bacterial to fungal  
458 growth rate at higher temperatures. Thus, the high temperatures under mulches in the summer in  
459 TN were above optimum growth conditions for soil microbes and may have reduced soil enzyme  
460 activities. Cold-adapted microorganisms, which are expected to be more prevalent at the WA site,  
461 tend to respond more efficiently to increased temperature than warm-adapted microbes (61). The  
462 greatest relative temperature sensitivity of decomposition processes has been observed at low  
463 temperatures (62). Warming experiments have revealed reduced xylosidase activity in soils (5-15  
464 cm deep) under medium-warmed plots compared to unwarmed plots (59). It has also been reported  
465 that warming induces decreases in the temperature sensitivity of  $\beta$ -xylosidase activity in the H  
466 horizon (63). One study reported greater increase of the relative temperature sensitivity of XYL  
467 and NAG (important for C cycling) at lower temperatures, compared to amino peptidase enzymes  
468 suggesting that temperature plays a pivotal role in regulating the use of substrates. Thus, the

469 turnover of easily degradable C substrates (like glucose) is more sensitive to temperature than  
470 higher molecular compounds, at least for cold soils (64).

471 Looking specifically at studies which assessed soil enzyme activities after treatment with  
472 biodegradable plastic film, one field study reported that soil microbial biomass and beta-  
473 glucosidase activity were most responsive to mulch; however that study did not have PE as a  
474 control, so it is unclear if this response was specific to BDMs or just related to plastic mulching  
475 generally (65). That study also focused on soils in close proximity to plastic, rather than bulk soil  
476 responses. Laboratory studies have shown increased esterase activity in soils during the  
477 degradation of PBSA (66), and increased microbial activity as per a fluorescein diacetate  
478 hydrolysis test during the degradation of a variety of biodegradable polymers (67). These studies  
479 provide insight into the potential of these enzymes in the degradation process of BDMs. Other  
480 studies that have looked at more general activity responses by microbes under plastic mulches (i.e.  
481 respiration) have reported mixed results: some have observed increases in activity under plastic  
482 mulches (68-71), while others report decreased activities (57).

483 In our recent paper from the same field sites as mentioned in the present study we have shown that  
484 biodegradable mulches do not have a significant impact soil health in terms of a suite of soil quality  
485 parameters tested over two years in TN and WA (31). Our findings corroborate the results from  
486 Sintim et al. (31) where it has also been shown that locational and seasonal variations are more  
487 important drivers of change in overall soil health under BDM tillage operations as compared to  
488 mulch treatment itself.

## 489 **5. Conclusion**

490 Two years of biodegradable and PE mulch treatments in a vegetable agroecosystem in two  
491 locations revealed some minor effects on soil microbial communities and their functions. While

492 we were not able to detect any significant effect of plastic mulches on bacterial community  
493 structure, richness or diversity, we did observe other impacts on the communities that were  
494 location-dependent. In particular, we noted that in WA, biodegradable mulches enriched for both  
495 bacteria and fungi, suggesting a response to BDM incorporation into soils; in contrast only  
496 bacterial enrichment was apparent in TN, and only for three of the five plastics tested. We  
497 additionally observed decreases in specific enzyme activities (NAG) under mulch treatments in  
498 TN but not WA, which may be attributable to increased temperatures under the plastics (i.e.  
499 microclimate modification) rather than mulch fragment incorporation into soil. Together, this  
500 shows that plastic mulches do have minor impacts on soil microbial communities and their  
501 functions, and that BDMs may have effects different from PE plastic mulches. As microbes are  
502 the drivers of soil carbon and nutrient cycling, changes in bacterial and fungal abundances and/or  
503 activity can have repercussions for soil organic matter dynamics and nutrient availabilities. Longer  
504 term studies of repeated BDM incorporation are needed to determine if these microbial responses  
505 will significantly affect soil functioning and health. In addition, the fact that we saw different  
506 responses by the communities in two locations under identical management may mean that the  
507 ultimate impact of plastic mulching on soil functioning may be dependent on local climate and soil  
508 conditions.

## 509 **6. Acknowledgements**

510 This work was supported by the United States Department of Agriculture Specialty Crops  
511 Research Initiative, CAP (Award 2014-51181-22382 to JMD). Field experiments were designed  
512 and managed by A. Wszelaki, C. Miles, D. Ingles and D. Hayes, with help from staff at the East  
513 Tennessee Research and Education Center (Knoxville, TN) and Northwestern Washington  
514 Research and Extension Center (Mount Vernon, WA). We are grateful to BioBag Americas, Inc.

515 (Palm Harbor, FL, USA), Organix Solutions (Maple Grove, MN, USA), Custom Bioplastics  
516 (Burlington, WA, USA), (Metabolix Inc., (Cambridge, MA, USA), and Sunshine Paper Co.  
517 (Aurora, CO, USA) for the donation of mulches for the research experiments, and Techmer PM  
518 (Clinton, TN, USA) for preparation of the carbon black dye masterbatch and compounding of the  
519 PLA/PHA formulation used to prepare the PLA/PHA mulch film. Arnold Saxton provided  
520 statistical advice. We thank M English, J Moore, S Schexnayder, M Valendia, S Schaeffer, M  
521 Anunciado, K Henderson, S Keenan, LS Taylor, J Lique, Shuresh Ghimire, Andy Bary, M  
522 Starrett, D Cowan-Banker and other members of the JMD and MF labs for help with soil sample  
523 collection and processing. M Flury and D Hayes provided critical feedback on the manuscript.

524

525

526

527



528

## Tables and Figures

529 **Table 1** Manufacturers, major constituents, and physicochemical properties of the mulches used  
 530 in the study. Bio-based content data was provided by the manufacturers. Data reported from Hayes  
 531 et al. (51).

| Mulches              | Manufacturer                            | Major constituents <sup>a</sup>                                                                        | Weight (g m <sup>-2</sup> ) | Thickness (μm) | Elongation <sup>b</sup> (%) | Contact angle <sup>c</sup> (°) | Total carbon (%) | Biobased content (%) |
|----------------------|-----------------------------------------|--------------------------------------------------------------------------------------------------------|-----------------------------|----------------|-----------------------------|--------------------------------|------------------|----------------------|
| BioAgri®             | BioBag Americas, Inc., Dunedin, FL      | Mater-Bi® grade EF04P (blend of starch and PBAT)                                                       | 18.0                        | 26             | 260                         | 87.6                           | 57.6             | 20-25                |
| Naturecycle          | Custom Bioplastics, Burlington, WA      | Blend of starch and polyesters                                                                         | 25.4                        | 48             | 213                         | 69.2                           | 54.8             | ~ 20                 |
| Organix Film™        | A.G. Organix Solutions, Maple Grove, MN | BASF®ecovio® grade M2351(blend of PLA and PBAT)                                                        | 17.8                        | 20             | 273                         | 86.2                           | 51.4             | 10-20                |
| Experimental PLA/PHA | Metabolix Inc., Cambridge, MA           | 88.4% MD05-1501 (56% Ingeo PLA, 24% Mirel™ amorphous PHA, 15% CaCO <sub>3</sub> and 5% plasticizer and | 25.0                        | 33             | 247                         | 67.8                           | 47.5             | 86                   |

|                |                                      |                                                                                                                  |     |      |     |     |      |      |     |
|----------------|--------------------------------------|------------------------------------------------------------------------------------------------------------------|-----|------|-----|-----|------|------|-----|
|                |                                      | processing<br>additives),<br>10.0% Techmer<br>PLA M91432<br>(20% carbon<br>black<br>in PLA 3052)<br>and 1.6% PLA |     |      |     |     |      |      |     |
| WeedGuardPlus® | Sunshine<br>Paper Co.,<br>Aurora, CO | Cellulose                                                                                                        |     | 240  | 479 | 6.4 | <10  | 46.0 | 100 |
| Polyethylene   | Filmtech,<br>Allentown,<br>PA        | Linear<br>density<br>polyethylene                                                                                | low | 25.4 | 47  | 578 | 79.3 | 82.9 | < 1 |

532 <sup>a</sup>PBAT: Polybutylene co-adipate co-terephthalate; PLA: Polylactic acid; PHA:

533 Poly(hydroxyalkanoate); <sup>b</sup>Measured in machine direction; <sup>c</sup>Measured at 22°C.

534

535

536

537

538

539

540

541

542 **Table 2** The seven extracellular soil enzymes assayed for soils collected from Spring 2015-Spring  
 543 2017; their respective enzyme functions, substrates used for assays, and the role of each enzyme  
 544 in biogeochemical cycling. Standards used were MUB (4-methylumbelliferone) and MUC (7-  
 545 amino-4-methylcoumarin).

| Abbreviation | Enzyme name           | Enzyme         |                                          | Indicator of microbial activity |
|--------------|-----------------------|----------------|------------------------------------------|---------------------------------|
|              |                       | function       | Substrate used                           |                                 |
|              |                       | hemicellulose  | 4-MUB- $\beta$ -D-                       |                                 |
| XYL          | $\beta$ -xylosidase   | degradation    | xylopyranoside                           | Carbon cycling                  |
|              |                       | sugar          | 4-MUB- $\beta$ -D-                       |                                 |
| BG           | $\beta$ -glucosidase  | degradation    | glucopyranoside                          | Carbon cycling                  |
|              |                       | sugar          | 4-MUB- $\alpha$ -D-                      |                                 |
| AG           | $\alpha$ -glucosidase | degradation    | glucopyranoside                          | Carbon cycling                  |
|              | N-acetyl $\beta$      | chitin         |                                          | Carbon and                      |
| NAG          | glucosaminidase       | degradation    | 4-MUB-N-acetyl- $\beta$ -D-glucosaminide | Nitrogen cycling                |
|              | $\beta$ -D            | cellulose      |                                          |                                 |
| CB           | cellubiosidase        | degradation    | 4-MUB- $\beta$ -D-cellobioside           | Carbon cycling                  |
|              |                       | phosphorus     |                                          | Phosphorus                      |
| PHOS         | Phosphatase           | mineralization | 4-MUB phosphate                          | cycling                         |
|              |                       |                | L-leucine-7-amido-4-                     |                                 |
|              | Leucine amino         | protein        | methylcoumarin                           | Nitrogen                        |
| LAP          | peptidase             | degradation    | hydrochloride                            | mineralization                  |

546

547 **Table 3** Results (F values) of PERMANOVA tests for differences in bacterial community  
 548 composition by location (Knoxville (TN) and Mount Vernon (WA)), season and mulch treatment.  
 549 Significant differences are in bold; \*p < 0.05; \*\*p < 0.01; \*\*\*p < 0.001

| Factor/treatment               | Levels                                                                                            | TN (F)           | WA (F)          |
|--------------------------------|---------------------------------------------------------------------------------------------------|------------------|-----------------|
| Location                       | TN, WA                                                                                            | <b>117.34***</b> |                 |
| Season                         | Spring 2015, Fall 2015, Spring 2016, Fall 2016                                                    | <b>17.83***</b>  | <b>32.84***</b> |
| Mulch treatments (Spring 2015) | 7 treatments:<br>5 BDMs (BioAgri, Organix, PLA/PHA, Naturecycle, Weedguard), PE, no mulch control | 0.61             | 0.81            |
| Mulch treatments (Fall 2015)   |                                                                                                   | 0.87             | <b>1.96**</b>   |
| Mulch treatments (Spring 2016) |                                                                                                   | 0.84             | 0.81            |
| Mulch treatments (Fall 2016)   |                                                                                                   | 1.15             | 1.26            |

550 BDMs = biodegradable mulches; PE = polyethylene

551

552 **Table 4** F values of fixed effects and interaction effects obtained from a mixed model analysis of  
 553 variance of the alpha diversity metrics richness (number of observed OTUs) and diversity index  
 554 (inverse Simpson) from Spring 2015 to Fall 2016 in Knoxville, TN and Mount Vernon, WA.  
 555 Significant values are in bold, \* $p < 0.05$ ; \*\* $p < 0.01$ ; \*\*\* $p < 0.001$

| Factor/treatment        | Levels                                                                                            | Richness F value | Diversity F value |
|-------------------------|---------------------------------------------------------------------------------------------------|------------------|-------------------|
| Location                | TN, WA                                                                                            | <b>24.42***</b>  | 2.98              |
| Treatment               | 7 treatments:<br>5 BDMs (BioAgri, Organix, PLA/PHA, Naturecycle, Weedguard), PE, no mulch control | 1.93             | 1.20              |
| Location*Treatment      |                                                                                                   | 1.22             | 1.58              |
| Time                    | Spring 2015, Fall 2015, Spring 2016, Fall 2016                                                    | <b>19.28***</b>  | <b>122.23***</b>  |
| Location*Time           |                                                                                                   | <b>6.06***</b>   | <b>3.84**</b>     |
| Treatment*Time          |                                                                                                   | <b>2.4**</b>     | 1.63              |
| Location*Treatment*Time |                                                                                                   | 0.55             | 1.09              |

556 BDMs = Biodegradable mulches; PE = polyethylene

557

558 **Table 5** T values from paired t-tests comparing 16S and ITS initial abundances from Spring 2015  
 559 to final abundances from Fall 2016 to determine significant changes over the two-year experiment  
 560 in Knoxville, TN and Mount Vernon, WA. Significant values are in bold, \*p < 0.05; \*\*p < 0.01;  
 561 \*\*\*p < 0.001.

| Mulch Treatments and Controls |                      | TN            |       | WA             |                |
|-------------------------------|----------------------|---------------|-------|----------------|----------------|
|                               |                      | 16S           | ITS   | 16S            | ITS            |
| Treatments                    | BioAgri              | 0.83          | 0.76  | <b>-4.30*</b>  | -2.27          |
|                               | Naturecycle          | -1.30         | -1.45 | -4.02          | <b>-6.87*</b>  |
|                               | Organix              | <b>-3.9*</b>  | -0.52 | <b>-4.30*</b>  | -3.05          |
|                               | Experimental PLA/PHA | <b>-3.51*</b> | -0.20 | <b>-8.34**</b> | <b>-5.64**</b> |
|                               | Weedguard            | -0.80         | -0.89 | <b>-3.52*</b>  | -1.50          |
| Controls                      | Polyethylene         | <b>-4.06*</b> | -0.23 | -2.53          | -0.02          |
|                               | No mulch             | -0.65         | -1.21 | -1.74          | -0.38          |

562

563

564

565 **Table 6** F values of fixed effects and interaction effects obtained from a mixed model analysis of  
566 variance of the soil enzyme activities from Spring 2015 to Spring 2017 in Knoxville, TN and  
567 Mount Vernon, WA. Significant values are in bold, \* $p < 0.05$ ; \*\* $p < 0.01$ ; \*\*\* $p < 0.001$

| Effect                                | TN                 |                  |               | WA                 |                 |               |
|---------------------------------------|--------------------|------------------|---------------|--------------------|-----------------|---------------|
|                                       | Treatment*Time (F) | Time (F)         | Treatment (F) | Treatment*Time (F) | Time (F)        | Treatment (F) |
| $\beta$ -xylosidase                   | 1.55               | <b>46.48****</b> | 2.21          | 0.88               | <b>5.12***</b>  | 0.89          |
| $\beta$ -glucosidase                  | 0.92               | <b>29.56****</b> | 1.49          | 0.91               | <b>3.44*</b>    | 0.84          |
| $\alpha$ -glucosidase                 | 1.52               | <b>40.16****</b> | 2.62          | 0.65               | <b>13.31***</b> | 1.12          |
| N-acetyl $\beta$ glucosami-<br>nidase | 1.26               | <b>34.60****</b> | <b>2.53*</b>  | 0.78               | <b>6.06***</b>  | 0.64          |
| $\beta$ -D<br>cellubiosidase          | 0.88               | <b>32.82****</b> | 1.03          | 0.72               | 0.27            | 0.75          |
| Phosphatase                           | 1.04               | <b>68.23****</b> | 1.37          | 0.96               | <b>4.10**</b>   | 1.13          |
| Leucine amino<br>peptidase            | 0.96               | <b>28.83****</b> | 1.71          | 0.77               | 0.65            | 0.34          |



569 a)

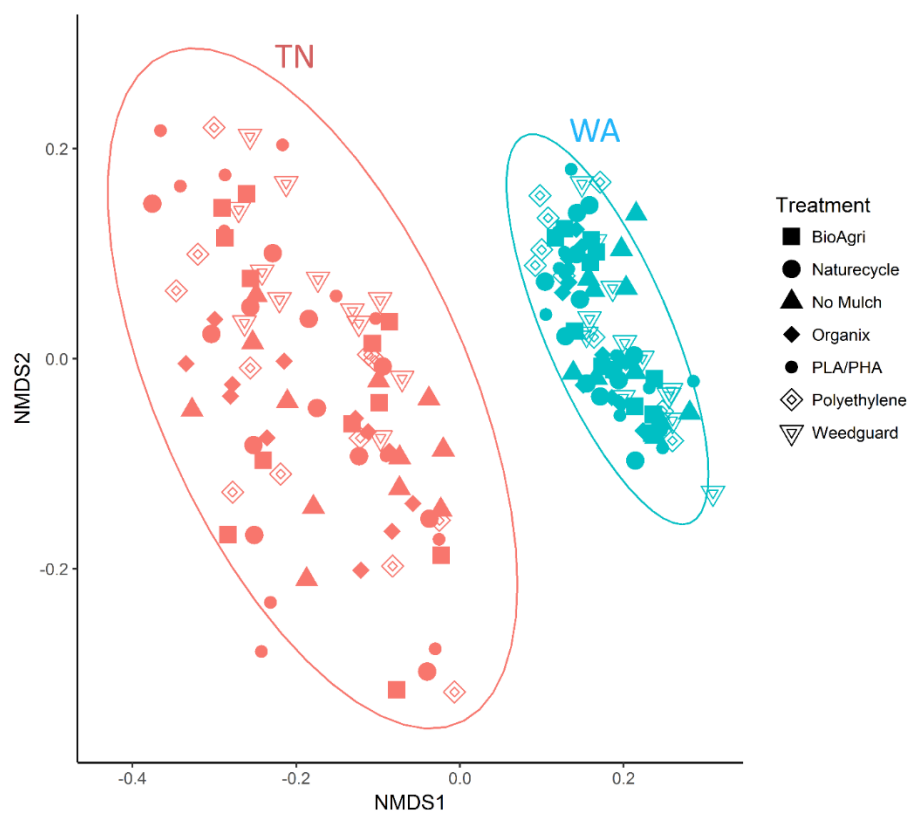

570

571

572

573

574

575

576

577

578

579 b)

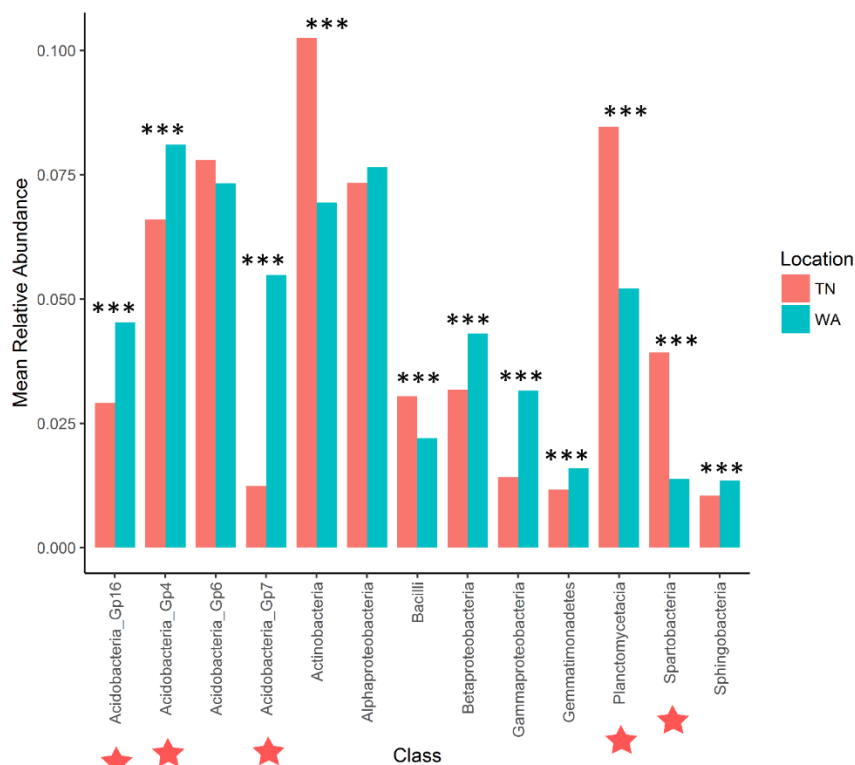

580

581 **Fig 1** Bacterial community composition differences between the two field locations, showing

582 communities from all four sampling times. a) Non-metric multidimensional scaling (NMDS)

583 ordination of Bray-Curtis dissimilarities of OTU relative abundances, highlighting differences

584 between location (PERMANOVA  $p = 0.001$ ). Each point corresponds to the whole microbial

585 community of one plot in the field (4 time points \* 3 reps, total 12 points for each treatment).

586 Ellipses denote clustering at 95% confidence. NMDS stress value: 0.14. b) Bar plot showing

587 differences in mean relative abundance of the most abundant classes of bacteria in TN and WA,

588 aggregating all treatments and all four sampling times. Asterisks denote significant differences

589 between locations, determined by ANOVA (\* $p \leq 0.05$ , \*\* $p \leq 0.01$ , \*\*\* $p \leq 0.001$ ). Red stars

590 indicate taxa which cumulatively contributed up to 46% of the variance in microbial communities

591 between TN and WA, determined using SIMPER.

592 a)

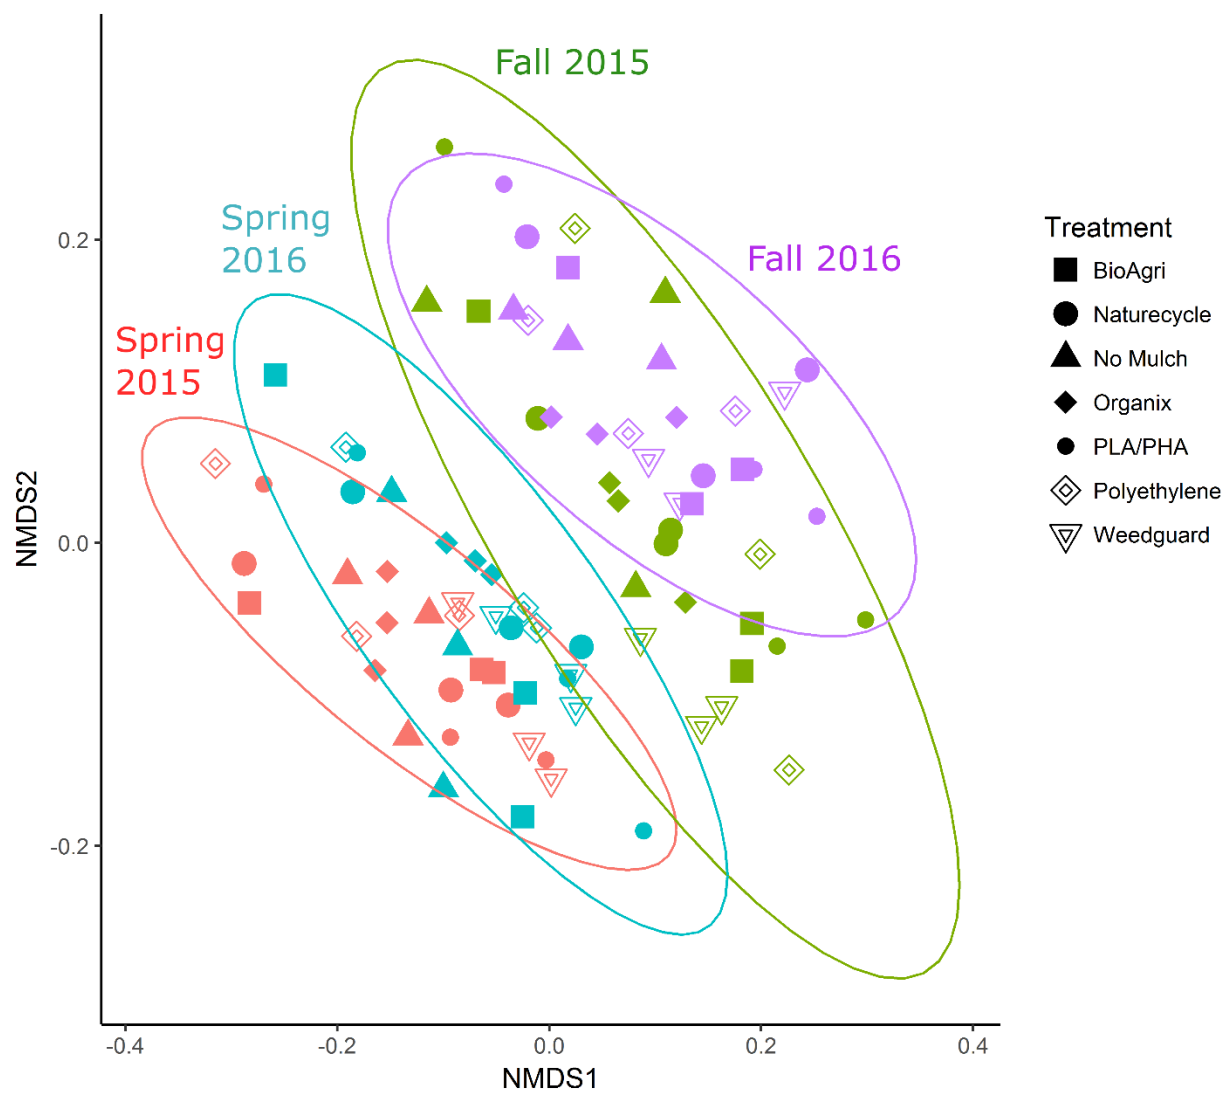

593

594 b)

595

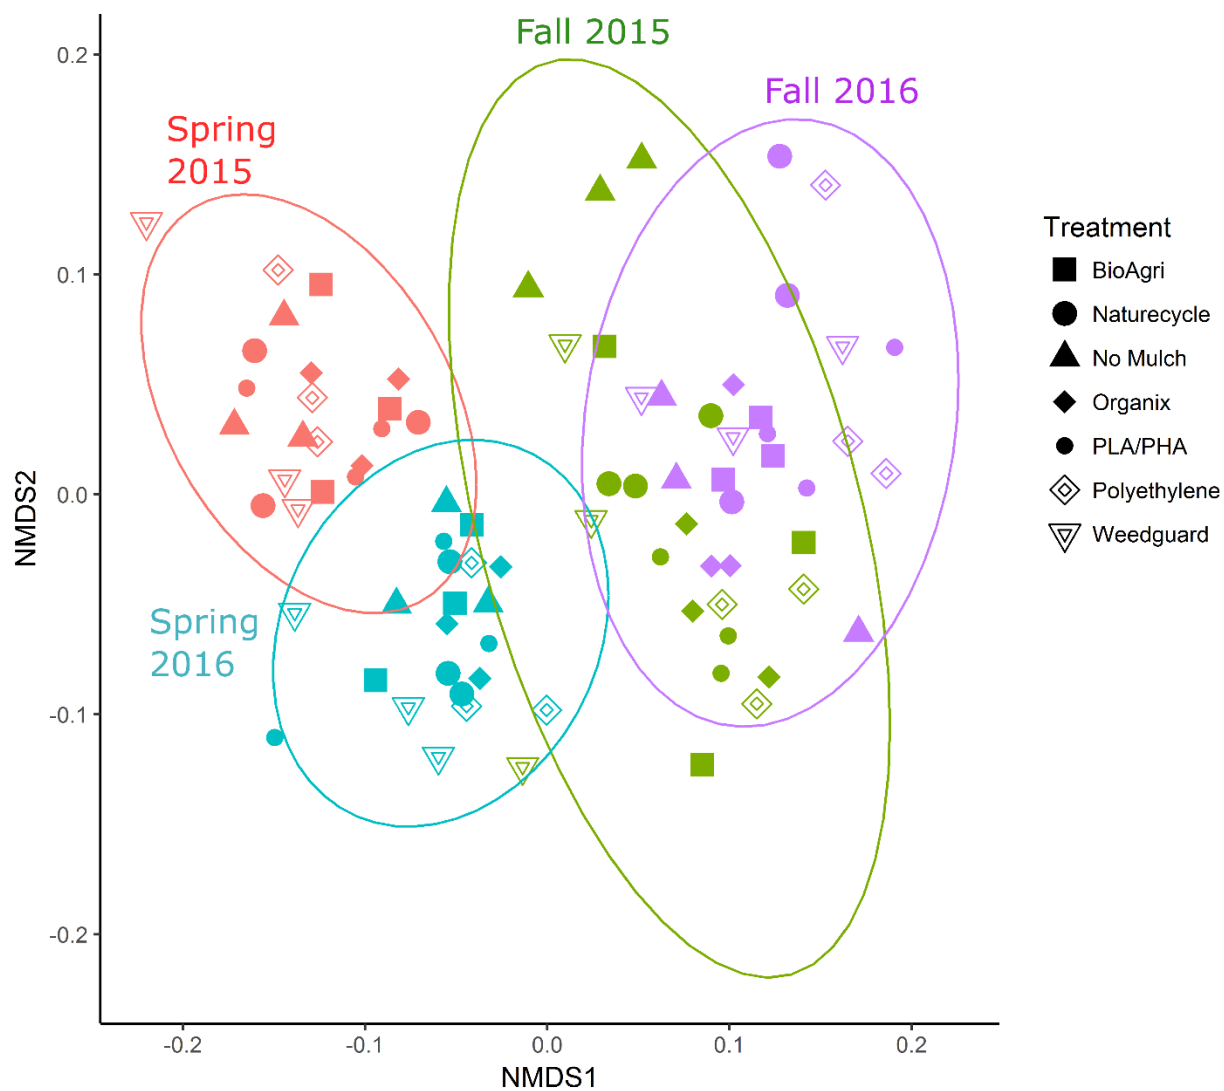

596

597

598 **Fig 2** NMDS ordination of Bray Curtis dissimilarities of soil bacterial communities a) TN ( $p =$   
599  $0.001$ ) and b) WA ( $p = 0.001$ ). Ellipses denote clustering at 95% confidence. NMDS stress  
600 value: 0.17 (TN), 0.16 (WA).

601

602 a)

603

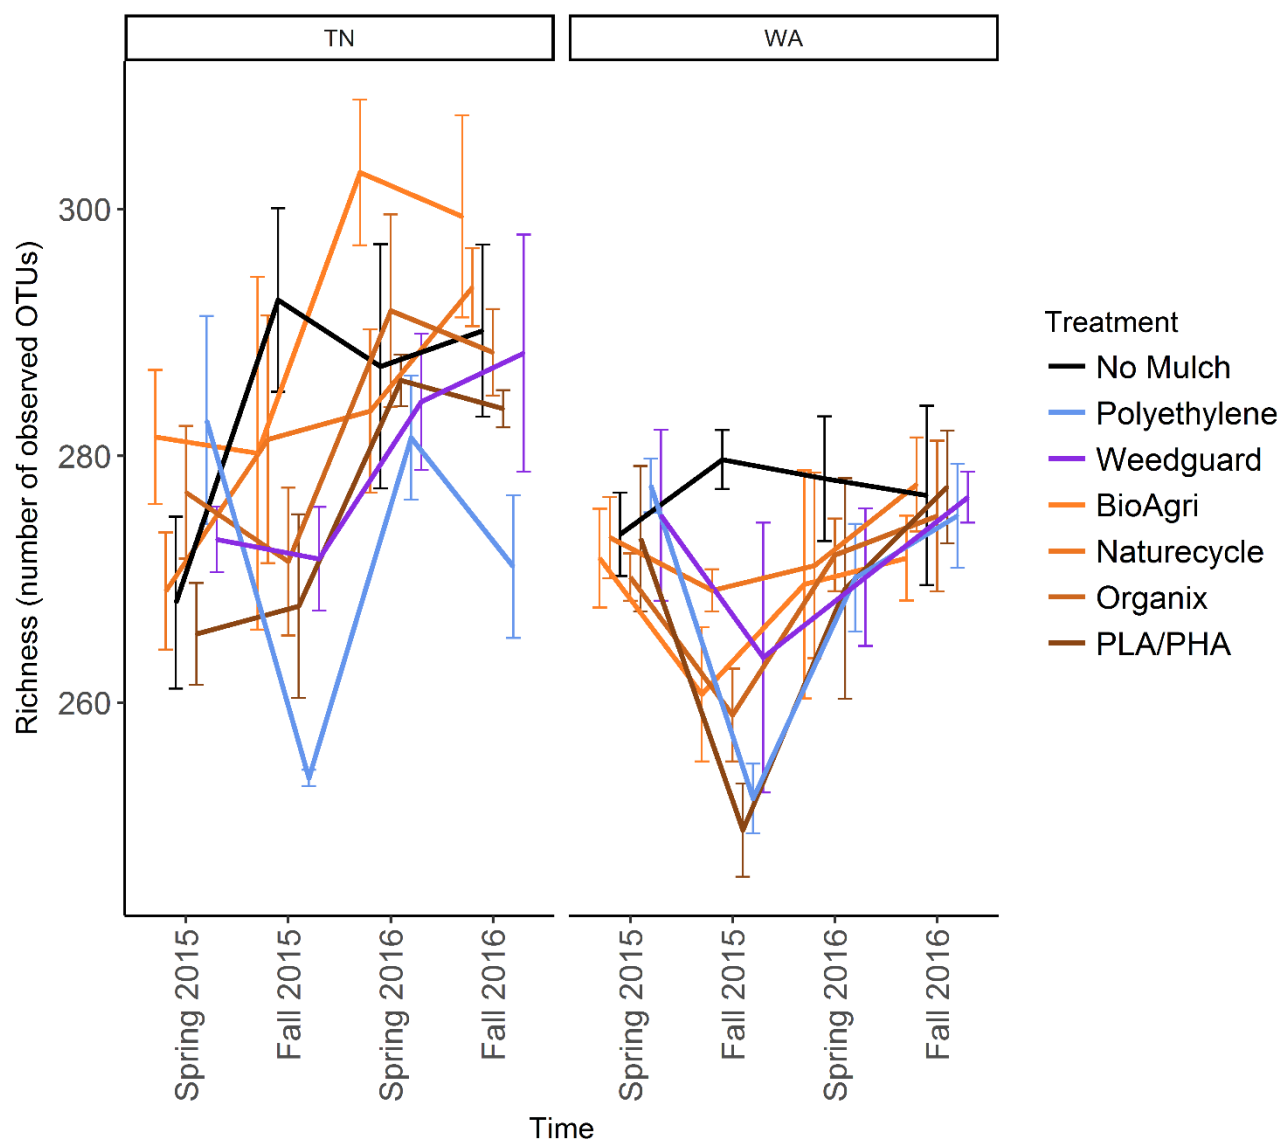

604

605

606

607

608

609 b)  
610

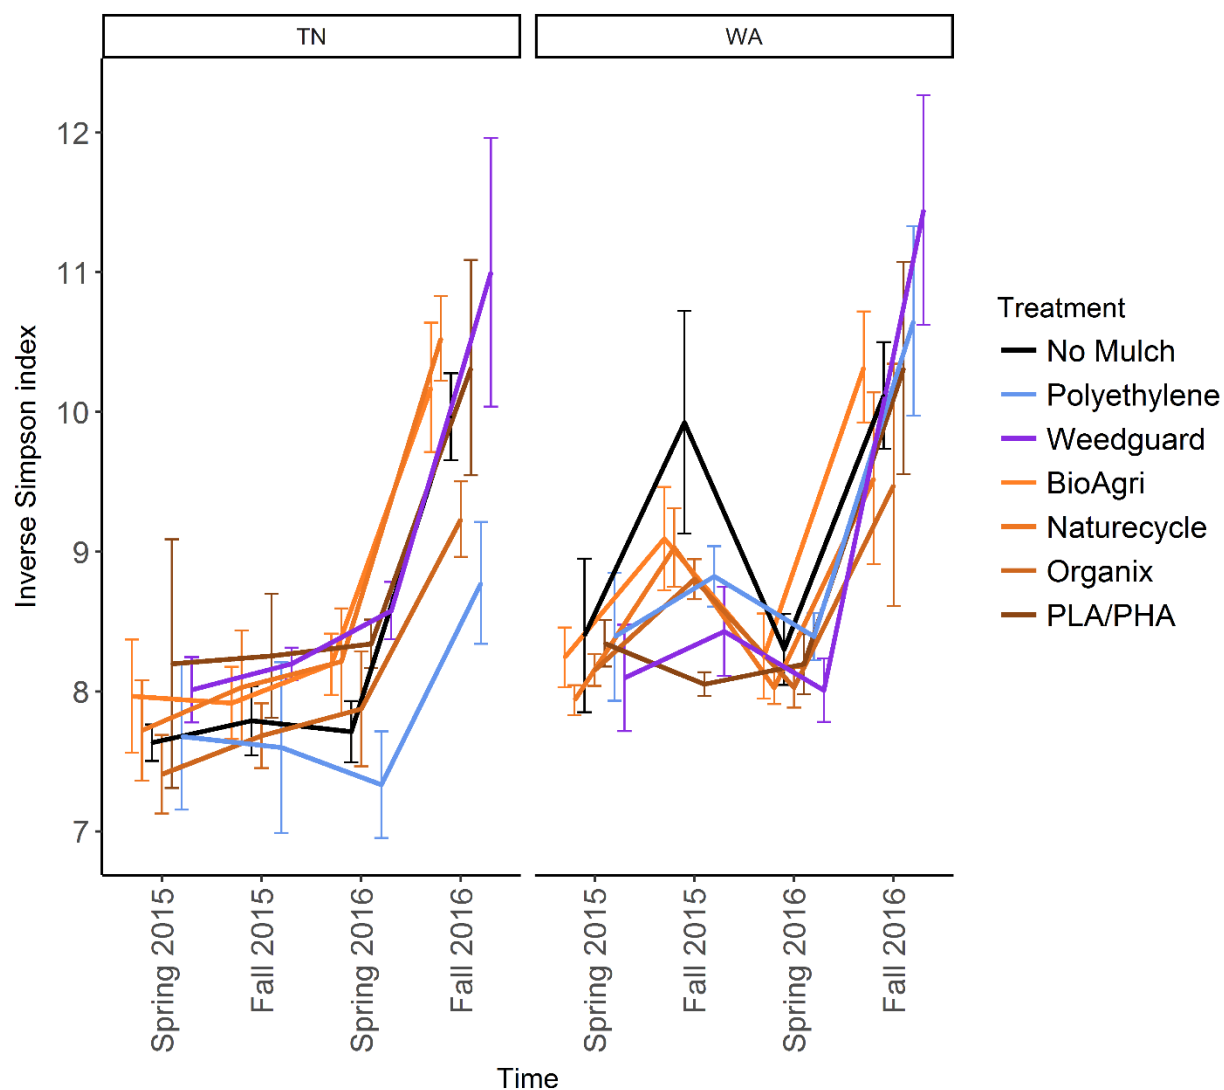

611  
612 **Fig 3** a) Richness (number of unique OTUs) and b) Inverse Simpson estimates over time of soil  
613 microbial communities in TN and WA. Error bars indicate SEM of three replicate samples.

614

615

616 a)

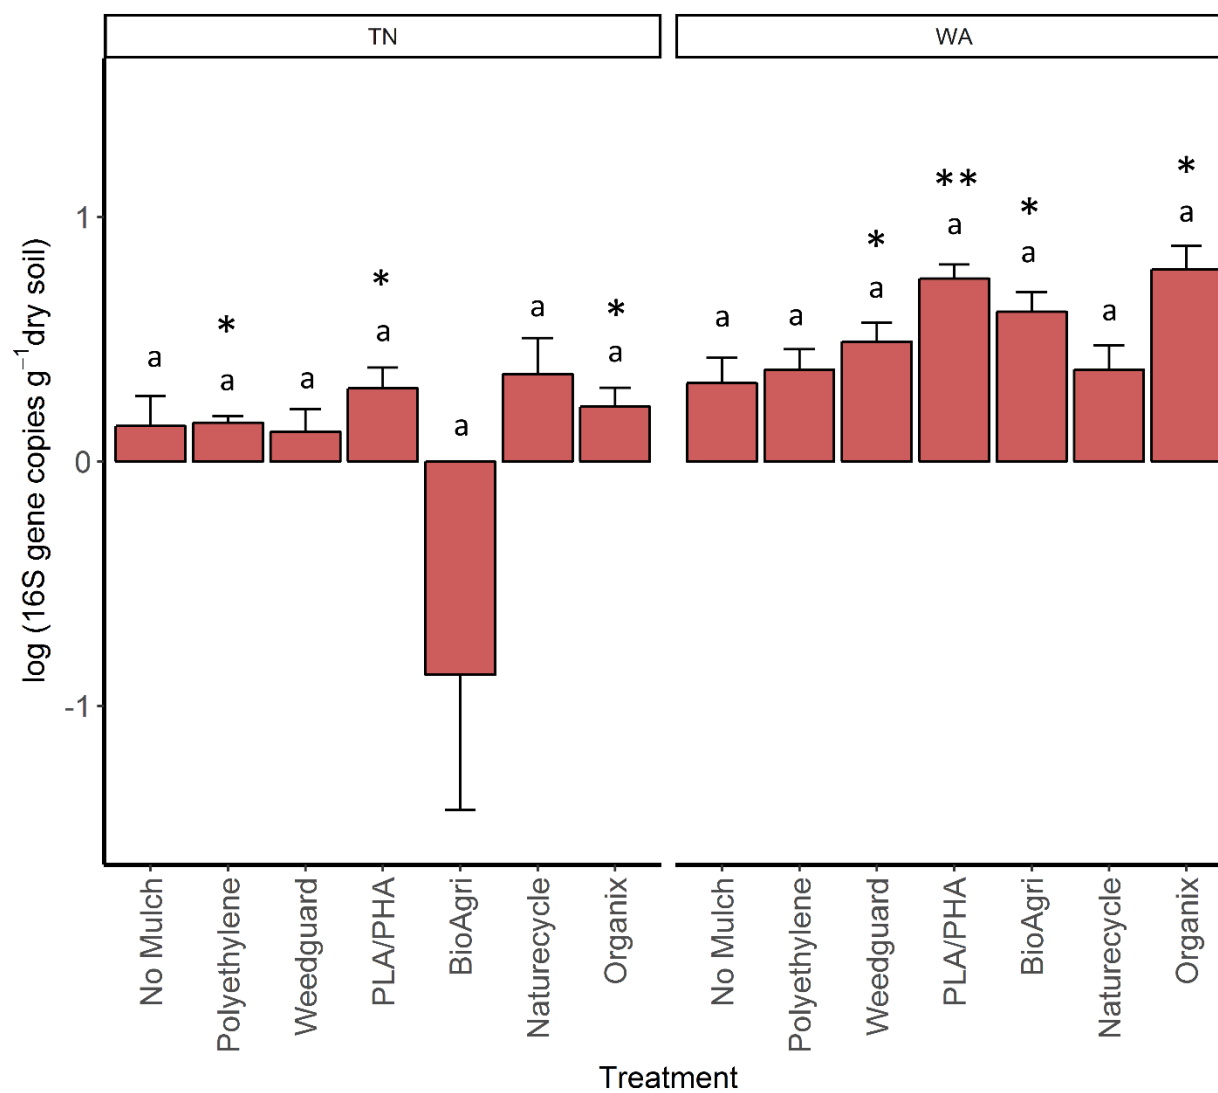

617

618

619

620

621

622

623 b)

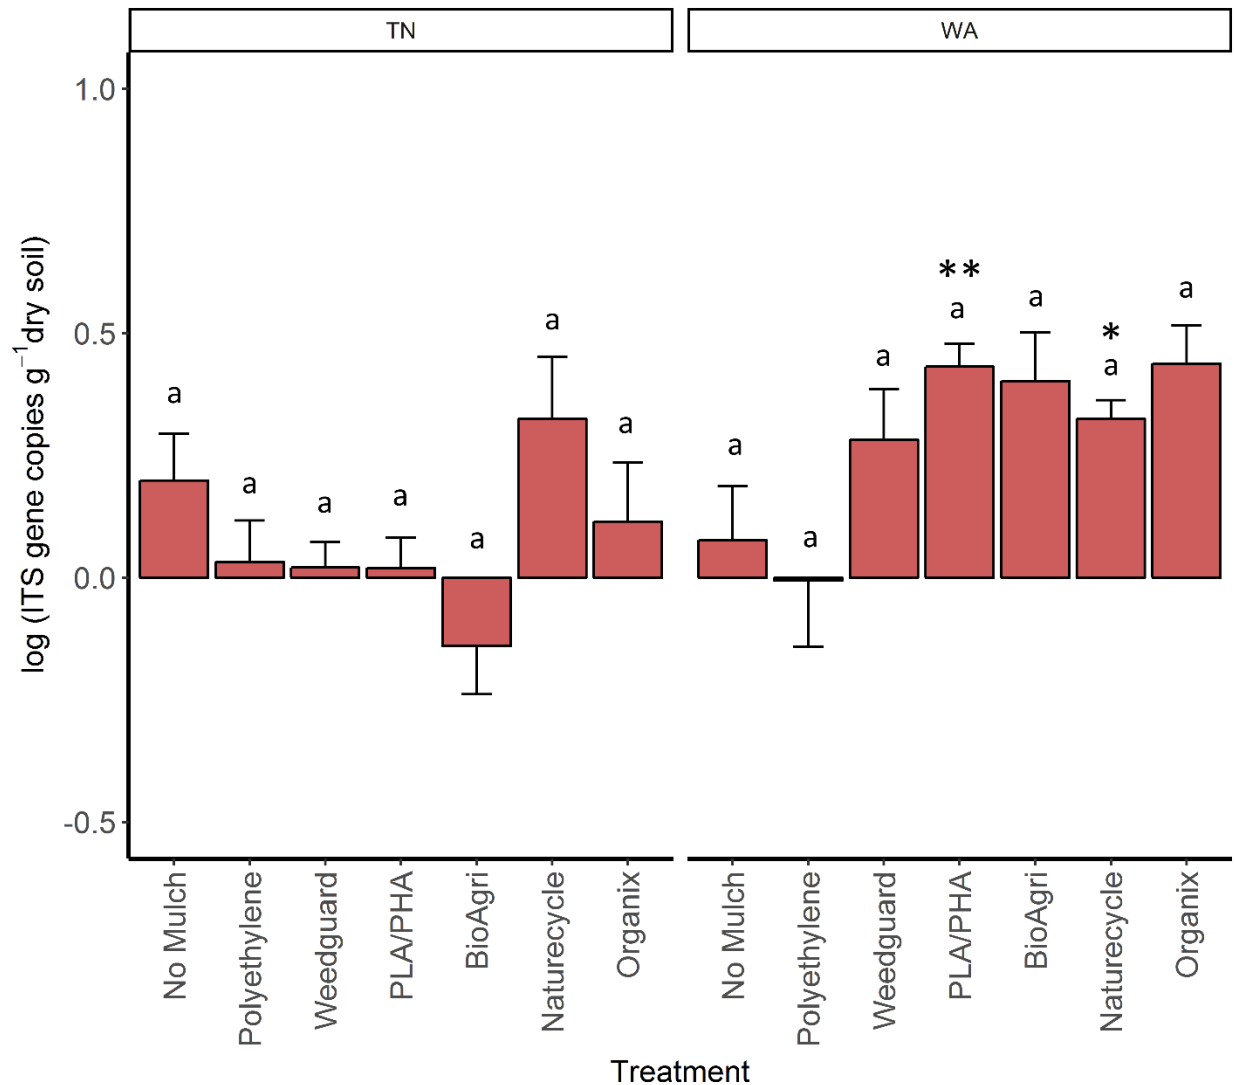

624

625 **Fig 4** a) 16S and b) ITS gene copy number changes over two years in TN and WA analyzed using  
626 a mixed model analysis of variance. Final time point (Fall 2016) is plotted by subtracting baseline  
627 abundances from Spring 2015. Error bars indicate SEM of four replicate samples. Lowercase  
628 letters denote significant differences between treatments ( $p \leq 0.05$ , Tukey's HSD). Asterisks  
629 indicate treatments which showed significant enrichment using a paired t-test ( $*p \leq 0.05$ ,  $**p \leq$   
630  $0.01$ ,  $***p \leq 0.001$ ).



631 a)

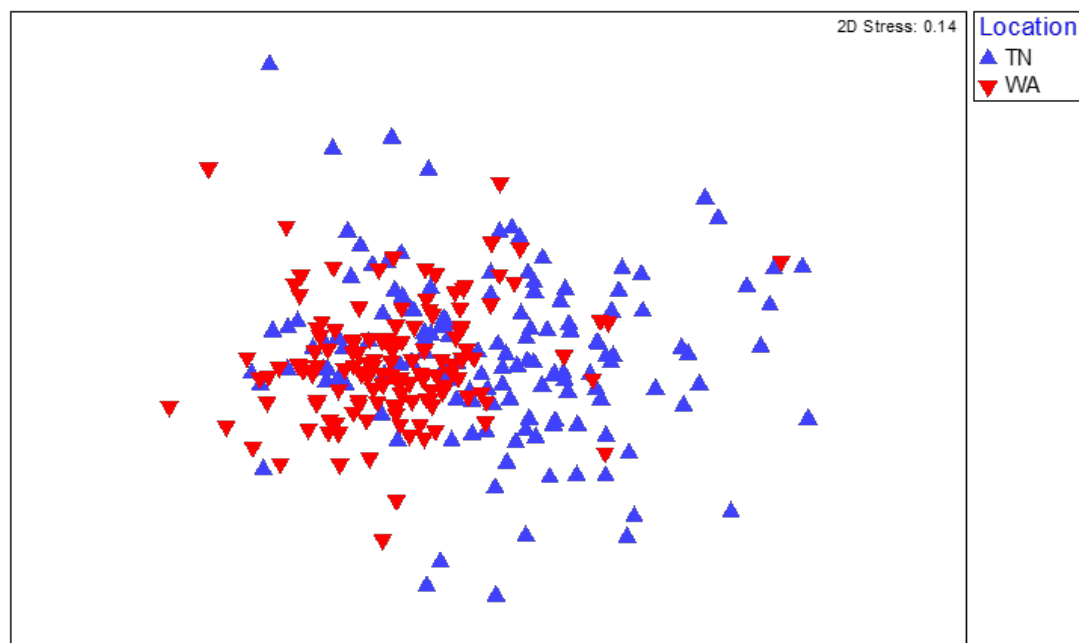

632

633 b)

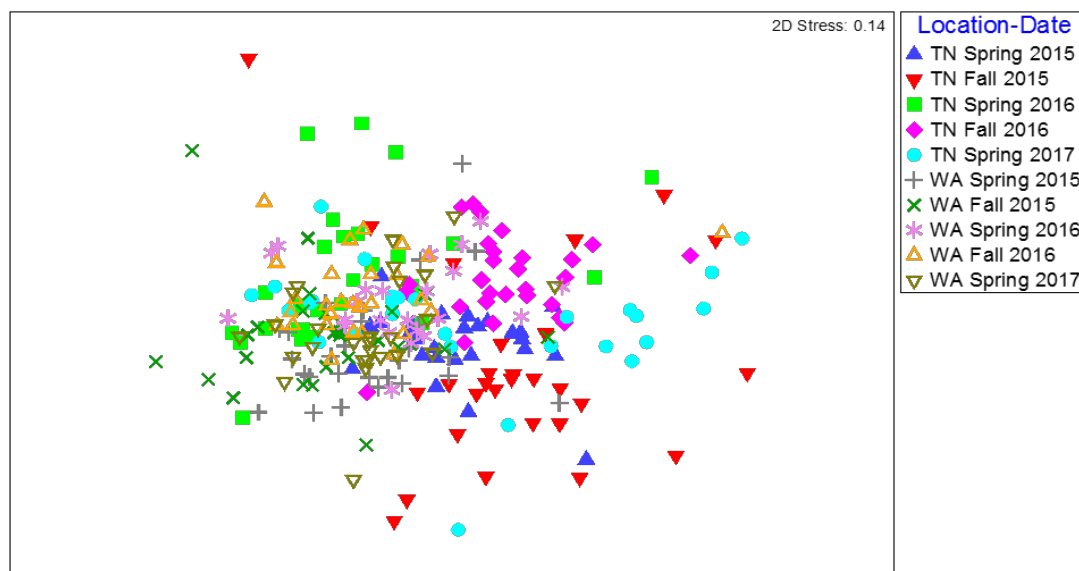

634

635 **Fig 5** NMDS ordination depicting Bray-Curtis similarity of the functional profile of soil microbial  
636 communities (based on 7 soil enzyme activity rates) across a) Location ( $p < 0.05$ ) and b) Date ( $p$   
637  $< 0.05$ ).

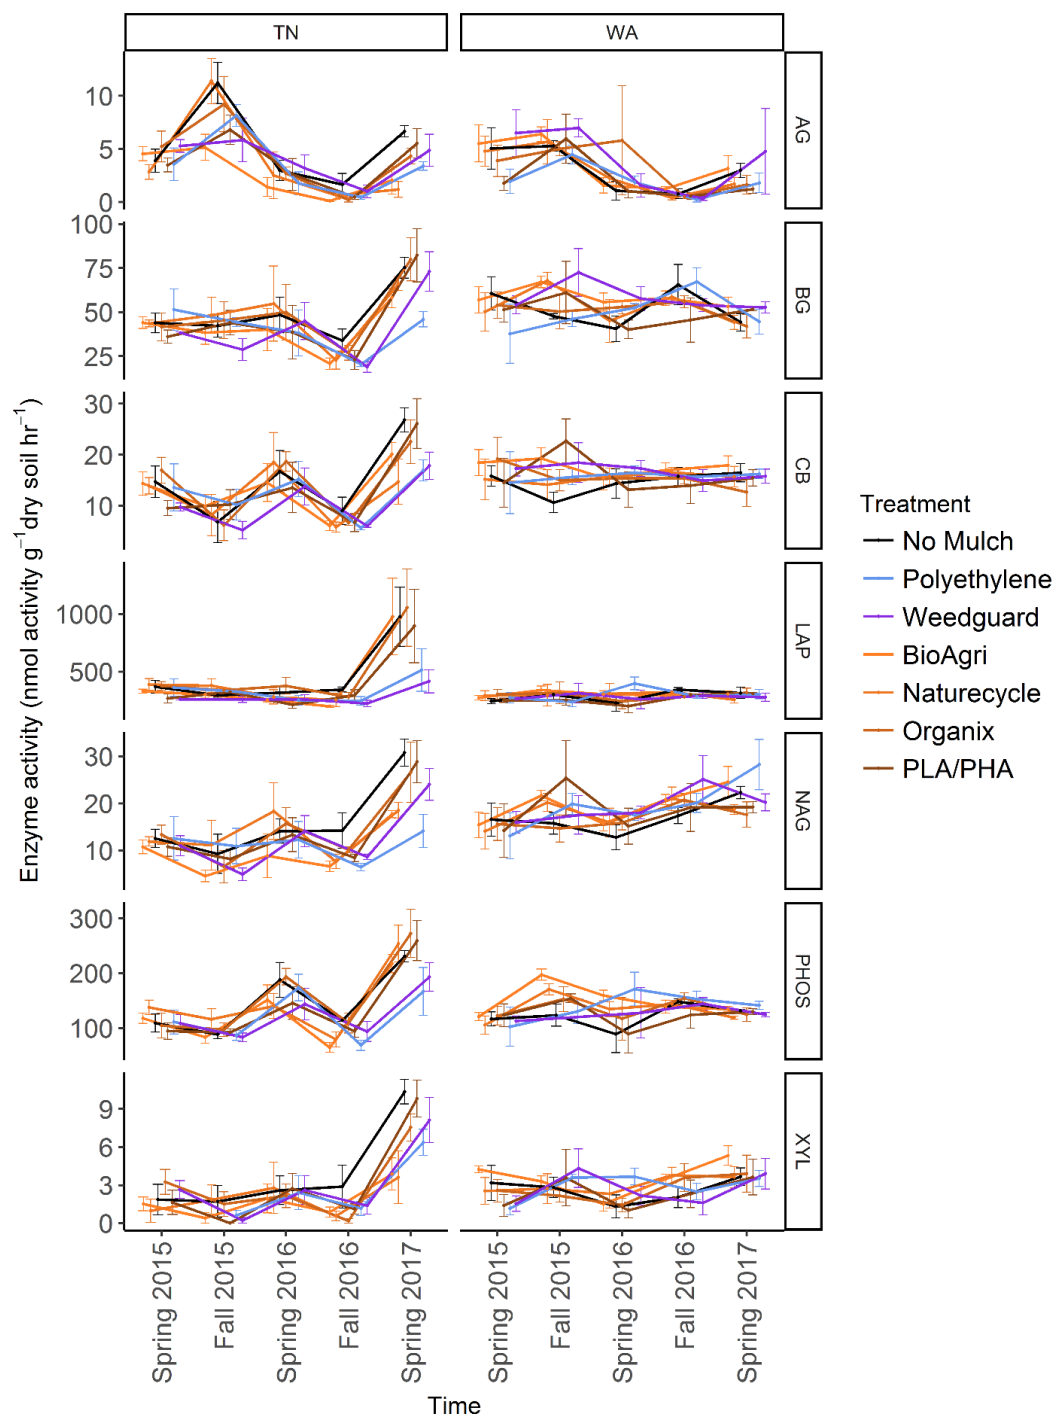

638

639 **Fig 6** Changes in soil enzyme activity over time across mulch treatment (p values reported in Table  
 640 6). Error bars indicate SEM of four replicate samples.

641

642 **References:**

- 643 1. Martín-Closas L, Costa J, Pelacho AM. 2017. Agronomic Effects of Biodegradable Films  
644 on Crop and Field Environment, p 67-104. *In* Malinconico M (ed), Soil Degradable  
645 Bioplastics for a Sustainable Modern Agriculture doi:10.1007/978-3-662-54130-2\_4.  
646 Springer Berlin Heidelberg, Berlin, Heidelberg.
- 647 2. Kader MA, Senge M, Mojid MA, Ito K. 2017. Recent advances in mulching materials and  
648 methods for modifying soil environment. *Soil and Tillage Research* 168:155-166.
- 649 3. Shahi V, Lalit B, Maurya S, Dharendra S. 2017. Influence of drip irrigation and  
650 polyethylene mulch on production and economics of broccoli. *Environment and Ecology*  
651 35:301-306.
- 652 4. Kasirajan S, Ngouajio M. 2012. Polyethylene and biodegradable mulches for agricultural  
653 applications: a review. *Agronomy for Sustainable Development* 32:501-529.
- 654 5. Bandopadhyay S, Martin-Closas L, Pelacho AM, DeBruyn JM. 2018. Biodegradable  
655 Plastic Mulch Films: Impacts on Soil Microbial Communities and Ecosystem Functions.  
656 *Frontiers in Microbiology* 9:819.
- 657 6. Brodhagen M, Peyron M, Miles C, Inglis DA. 2015. Biodegradable plastic agricultural  
658 mulches and key features of microbial degradation. *Applied Microbiology and*  
659 *Biotechnology* 99:1039-1056.
- 660 7. Liu EK, He WQ, Yan CR. 2014. ‘White revolution’ to ‘white pollution’—agricultural  
661 plastic film mulch in China. *Environmental Research Letters* 9:091001.
- 662 8. Barnes DK, Galgani F, Thompson RC, Barlaz M. 2009. Accumulation and fragmentation  
663 of plastic debris in global environments. *Philosophical Transactions of the Royal Society*  
664 *of London B: Biological Sciences* 364:1985-1998.

- 665 9. Teuten EL, Saquing JM, Knappe DR, Barlaz MA, Jonsson S, Björn A, Rowland SJ,  
666 Thompson RC, Galloway TS, Yamashita R. 2009. Transport and release of chemicals from  
667 plastics to the environment and to wildlife. *Philosophical Transactions of the Royal Society*  
668 *of London B: Biological Sciences* 364:2027-2045.
- 669 10. Sivan A. 2011. New perspectives in plastic biodegradation. *Current opinion in*  
670 *biotechnology* 22:422-426.
- 671 11. Rillig MC. 2012. *Microplastic in terrestrial ecosystems and the soil?* ACS Publications.
- 672 12. Huerta Lwanga E, Gertsen H, Gooren H, Peters P, Salánki T, van der Ploeg M, Besseling  
673 E, Koelmans AA, Geissen V. 2016. Microplastics in the terrestrial ecosystem: implications  
674 for *Lumbricus terrestris* (Oligochaeta, Lumbricidae). *Environmental science & technology*  
675 50:2685-2691.
- 676 13. de Souza Machado AA, Lau CW, Till J, Kloas W, Lehmann A, Becker R, Rillig MC. 2018.  
677 *Impacts of Microplastics on the Soil Biophysical Environment.* *Environmental Science &*  
678 *Technology* 52:9656-9665.
- 679 14. Van Wezel A, Van Vlaardingen P, Posthumus R, Crommentuijn G, Sijm D. 2000.  
680 *Environmental risk limits for two phthalates, with special emphasis on endocrine disruptive*  
681 *properties.* *Ecotoxicology and Environmental Safety* 46:305-321.
- 682 15. Fu X, Du Q. 2011. Uptake of di-(2-ethylhexyl) phthalate of vegetables from plastic film  
683 greenhouses. *Journal of agricultural and food chemistry* 59:11585-11588.
- 684 16. Kong S, Ji Y, Liu L, Chen L, Zhao X, Wang J, Bai Z, Sun Z. 2012. Diversities of phthalate  
685 esters in suburban agricultural soils and wasteland soil appeared with urbanization in  
686 China. *Environmental Pollution* 170:161-168.

- 687 17. Magdouli S, Daghri R, Brar SK, Drogui P, Tyagi RD. 2013. Di 2-ethylhexylphthalate in  
688 the aquatic and terrestrial environment: a critical review. *Journal of environmental*  
689 *management* 127:36-49.
- 690 18. Wang J, Luo Y, Teng Y, Ma W, Christie P, Li Z. 2013. Soil contamination by phthalate  
691 esters in Chinese intensive vegetable production systems with different modes of use of  
692 plastic film. *Environmental Pollution* 180:265-273.
- 693 19. Wang J, Chen G, Christie P, Zhang M, Luo Y, Teng Y. 2015. Occurrence and risk  
694 assessment of phthalate esters (PAEs) in vegetables and soils of suburban plastic film  
695 greenhouses. *Science of the Total Environment* 523:129-137.
- 696 20. de Souza Machado AA, Kloas W, Zarfl C, Hempel S, Rillig MC. 2018. Microplastics as  
697 an emerging threat to terrestrial ecosystems. *Glob Chang Biol* 24:1405-1416.
- 698 21. Riggi E, Santagata G, Malinconico M. 2011. Bio-Based and Biodegradable Plastics for  
699 Use in Crop Production. *Recent Patents on Food, Nutrition & Agriculture* 3:49-63.
- 700 22. Kyrikou I, Briassoulis D. 2007. Biodegradation of agricultural plastic films: a critical  
701 review. *Journal of Polymers and the Environment* 15:125-150.
- 702 23. Hayes DG, Dharmalingam S, Wadsworth LC, Leonas KK, Miles C, Inglis DA. 2012.  
703 Biodegradable Agricultural Mulches Derived from Biopolymers, p 201-223, *Degradable*  
704 *Polymers and Materials: Principles and Practice (2nd Edition)*, vol 1114. American  
705 Chemical Society.
- 706 24. Kasirajan S, Ngouajio M. 2012. Polyethylene and biodegradable mulches for agricultural  
707 applications: A review, vol 32, p 501-529.

- 708 25. DeVetter LW, Zhang H, Ghimire S, Watkinson S, Miles CA. 2017. Plastic Biodegradable  
709 Mulches Reduce Weeds and Promote Crop Growth in Day-neutral Strawberry in Western  
710 Washington. *52*:1700.
- 711 26. Goldberger JR, Jones RE, Miles CA, Wallace RW, Inglis DA. 2015. Barriers and bridges  
712 to the adoption of biodegradable plastic mulches for US specialty crop production.  
713 *Renewable Agriculture and Food Systems* 30:143-153.
- 714 27. Miles C, DeVetter L, Ghimire S, Hayes DG. 2017. Suitability of Biodegradable Plastic  
715 Mulches for Organic and Sustainable Agricultural Production Systems. *HortScience* 52:10-  
716 15.
- 717 28. Brodhagen M, Goldberger JR, Hayes DG, Inglis DA, Marsh TL, Miles C. 2017. Policy  
718 considerations for limiting unintended residual plastic in agricultural soils. *Environmental*  
719 *Science & Policy* 69:81-84.
- 720 29. Li C, Moore-Kucera J, Miles C, Leonas K, Lee J, Corbin A, Inglis D. 2014. Degradation  
721 of potentially biodegradable plastic mulch films at three diverse US locations. *Agroecology*  
722 *and sustainable food systems* 38:861-889.
- 723 30. Moore-Kucera J, Cox SB, Peyron M, Bailes G, Kinloch K, Karich K, Miles C, Inglis DA,  
724 Brodhagen M. 2014. Native soil fungi associated with compostable plastics in three  
725 contrasting agricultural settings. *Appl Microbiol Biotechnol* 98:6467-85.
- 726 31. Sintim HY, Bandopadhyay S, English ME, Bary AI, DeBruyn JM, Schaeffer SM, Miles  
727 CA, Reganold JP, Flury M. 2019. Impacts of biodegradable plastic mulches on soil health.  
728 *Agriculture, Ecosystems & Environment* 273:36-49.

- 729 32. Ghimire S, Wszelaki AL, Moore JC, Inglis DA, Miles C. 2018. The Use of Biodegradable  
730 Mulches in Pie Pumpkin Crop Production in Two Diverse Climates. *Hortscience* 53:288-  
731 294.
- 732 33. Caporaso JG, Lauber CL, Walters WA, Berg-Lyons D, Huntley J, Fierer N, Owens SM,  
733 Betley J, Fraser L, Bauer M, Gormley N, Gilbert JA, Smith G, Knight R. 2012. Ultra-high-  
734 throughput microbial community analysis on the Illumina HiSeq and MiSeq platforms. *The*  
735 *Isme Journal* 6:1621.
- 736 34. Schloss PD, Westcott SL, Ryabin T, Hall JR, Hartmann M, Hollister EB, Lesniewski RA,  
737 Oakley BB, Parks DH, Robinson CJ, Sahl JW, Stres B, Thallinger GG, Van Horn DJ,  
738 Weber CF. 2009. Introducing mothur: Open-Source, Platform-Independent, Community-  
739 Supported Software for Describing and Comparing Microbial Communities. *Applied and*  
740 *Environmental Microbiology* 75:7537.
- 741 35. Wang Q, Garrity GM, Tiedje JM, Cole JR. 2007. Naïve Bayesian Classifier for Rapid  
742 Assignment of rRNA Sequences into the New Bacterial Taxonomy. *Applied and*  
743 *Environmental Microbiology* 73:5261.
- 744 36. R. Core Team 2018. R: A Language and Environment for Statistical Computing. R  
745 Foundation for Statistical Computing, Vienna, Austria.
- 746 37. Bell CW, Fricks BE, Rocca JD, Steinweg JM, McMahon SK, Wallenstein MD. 2013.  
747 High-throughput fluorometric measurement of potential soil extracellular enzyme  
748 activities. *Journal of visualized experiments : JoVE* doi:10.3791/50961:e50961-e50961.
- 749 38. McMurdie PJ, Holmes S. 2013. phyloseq: An R Package for Reproducible Interactive  
750 Analysis and Graphics of Microbiome Census Data. *PLOS ONE* 8:e61217.

- 751 39. Berry M. April 14 2016. Microbial Community Diversity Analysis Tutorial with Phyloseq  
752 [http://deneflab.github.io/MicrobeMiseq/demos/mothur\\_2\\_phyloseq.html#constrained\\_or](http://deneflab.github.io/MicrobeMiseq/demos/mothur_2_phyloseq.html#constrained_or)  
753 [dinations](http://deneflab.github.io/MicrobeMiseq/demos/mothur_2_phyloseq.html#constrained_or). Accessed 2018-7-1.
- 754 40. Koitabashi M, Noguchi MT, Sameshima-Yamashita Y, Hiradate S, Suzuki K, Yoshida S,  
755 Watanabe T, Shinozaki Y, Tsushima S, Kitamoto HK. 2012. Degradation of biodegradable  
756 plastic mulch films in soil environment by phylloplane fungi isolated from gramineous  
757 plants. *AMB express* 2:40.
- 758 41. Muroi F, Tachibana Y, Kobayashi Y, Sakurai T, Kasuya K. 2016. Influences of  
759 poly(butylene adipate-co-terephthalate) on soil microbiota and plant growth. *Polymer*  
760 *Degradation and Stability* 129:338-346.
- 761 42. Farmer J, Zhang B, Jin XX, Zhang P, Wang JK. 2017. Long-term effect of plastic film  
762 mulching and fertilization on bacterial communities in a brown soil revealed by high  
763 through-put sequencing. *Archives of Agronomy and Soil Science* 63:230-241.
- 764 43. Munoz K, Schmidt-Heydt M, Stoll D, Diehl D, Ziegler J, Geisen R, Schaumann GE. 2015.  
765 Effect of plastic mulching on mycotoxin occurrence and mycobiome abundance in soil  
766 samples from asparagus crops. *Mycotoxin Res* 31:191-201.
- 767 44. Rousk J, Bååth E, Brookes PC, Lauber CL, Lozupone C, Caporaso JG, Knight R, Fierer N.  
768 2010. Soil bacterial and fungal communities across a pH gradient in an arable soil. *The*  
769 *Isme Journal* 4:1340.
- 770 45. Fierer N, Jackson RB. 2006. The diversity and biogeography of soil bacterial communities.  
771 *Proceedings of the National Academy of Sciences of the United States of America* 103:626.
- 772 46. Docherty KM, Borton HM, Espinosa N, Gebhardt M, Gil-Loaiza J, Gutknecht JLM, Maes  
773 PW, Mott BM, Parnell JJ, Purdy G, Rodrigues PAP, Stanish LF, Walser ON, Gallery RE.



- 774 2015. Key Edaphic Properties Largely Explain Temporal and Geographic Variation in Soil  
775 Microbial Communities across Four Biomes. PLoS ONE 10:e0135352.
- 776 47. Pathak VM, Navneet. 2017. Review on the current status of polymer degradation: a  
777 microbial approach. Bioresources and Bioprocessing 4:15.
- 778 48. Kapanen A, Schettini E, Vox G, Itävaara M. 2008. Performance and Environmental Impact  
779 of Biodegradable Films in Agriculture: A Field Study on Protected Cultivation. Journal of  
780 Polymers and the Environment 16:109-122.
- 781 49. Ma ZF, Ma YB, Qin LZ, Liu JX, Su HJ. 2016. Preparation and characteristics of  
782 biodegradable mulching films based on fermentation industry wastes. International  
783 Biodeterioration & Biodegradation 111:54-61.
- 784 50. Rychter P, Biczak R, Herman B, Smylla A, Kurcok P, Adamus G, Kowalczyk M. 2006.  
785 Environmental degradation of polyester blends containing atactic poly(3-  
786 hydroxybutyrate). Biodegradation in soil and ecotoxicological impact. Biomacromolecules  
787 7:3125-31.
- 788 51. Hayes DG, Wadsworth LC, Sintim HY, Flury M, English M, Schaeffer S, Saxton AM.  
789 2017. Effect of diverse weathering conditions on the physicochemical properties of  
790 biodegradable plastic mulches. Polymer Testing 62:454-467.
- 791 52. Al-Kaisi MM, Lal R. 2017. Chapter 4 - Conservation Agriculture Systems to Mitigate  
792 Climate Variability Effects on Soil Health, p 79-107. *In* Al-Kaisi MM, Lowery B (ed), Soil  
793 Health and Intensification of Agroecosystems doi:[https://doi.org/10.1016/B978-0-12-](https://doi.org/10.1016/B978-0-12-805317-1.00004-X)  
794 [805317-1.00004-X](https://doi.org/10.1016/B978-0-12-805317-1.00004-X). Academic Press.

- 795 53. Lauber CL, Strickland MS, Bradford MA, Fierer N. 2008. The influence of soil properties  
796 on the structure of bacterial and fungal communities across land-use types. *Soil Biology*  
797 *and Biochemistry* 40:2407-2415.
- 798 54. Alam MK, Islam MM, Salahin N, Hasanuzzaman M. 2014. Effect of Tillage Practices on  
799 Soil Properties and Crop Productivity in Wheat-Mungbean-Rice Cropping System under  
800 Subtropical Climatic Conditions. *The Scientific World Journal* 2014:15.
- 801 55. Busari MA, Kukal SS, Kaur A, Bhatt R, Dulazi AA. 2015. Conservation tillage impacts on  
802 soil, crop and the environment. *International Soil and Water Conservation Research* 3:119-  
803 129.
- 804 56. Zuber SM, Behnke GD, Nafziger ED, Villamil MB. 2015. Crop Rotation and Tillage  
805 Effects on Soil Physical and Chemical Properties in Illinois. *Agronomy Journal* 107:971-  
806 978.
- 807 57. Moreno MM, Moreno A. 2008. Effect of different biodegradable and polyethylene mulches  
808 on soil properties and production in a tomato crop. *Scientia Horticulturae* 116:256-263.
- 809 58. Qin W, Hu CS, Oenema O. 2015. Soil mulching significantly enhances yields and water  
810 and nitrogen use efficiencies of maize and wheat: a meta-analysis. *Scientific Reports*  
811 5:16210.
- 812 59. Steinweg JM, Dukes JS, Paul EA, Wallenstein MD. 2013. Microbial responses to multi-  
813 factor climate change: effects on soil enzymes. *Frontiers in microbiology* 4:146-146.
- 814 60. Pietikainen J, Pettersson M, Baath E. 2005. Comparison of temperature effects on soil  
815 respiration and bacterial and fungal growth rates. *FEMS Microbiol Ecol* 52:49-58.
- 816 61. Brzostek ER, Finzi AC. 2011. Substrate supply, fine roots, and temperature control  
817 proteolytic enzyme activity in temperate forest soils. *Ecology* 92:892-902.

- 818 62. Kirschbaum MUF. 1995. The temperature dependence of soil organic matter  
819 decomposition, and the effect of global warming on soil organic C storage. *Soil Biology*  
820 *and Biochemistry* 27:753-760.
- 821 63. Souza RC, Solly EF, Dawes MA, Graf F, Hagedorn F, Egli S, Clement CR, Nagy L, Rixen  
822 C, Peter M. 2017. Responses of soil extracellular enzyme activities to experimental  
823 warming and CO<sub>2</sub> enrichment at the alpine treeline. *Plant and Soil* 416:527-537.
- 824 64. Koch O, Tscherko D, Kandeler E. 2007. Temperature sensitivity of microbial respiration,  
825 nitrogen mineralization, and potential soil enzyme activities in organic alpine soils. *Global*  
826 *Biogeochemical Cycles* 21.
- 827 65. Li C, Moore-Kucera J, Lee J, Corbin A, Brodhagen M, Miles C, Inglis D. 2014. Effects of  
828 biodegradable mulch on soil quality. *Applied Soil Ecology* 79:59-69.
- 829 66. Yamamoto-Tamura K, Hiradate S, Watanabe T, Koitabashi M, Sameshima-Yamashita Y,  
830 Yarimizu T, Kitamoto H. 2015. Contribution of soil esterase to biodegradation of aliphatic  
831 polyester agricultural mulch film in cultivated soils. *AMB Express* 5:10.
- 832 67. Barragán D, Pelacho A, Martin-Closas L. 2016. Degradation of agricultural biodegradable  
833 plastics in the soil under laboratory conditions. *Soil Research* 54:216-224.
- 834 68. Mu L, Fang L, Liang Y. 2016. Temporal and spatial variation of soil respiration under  
835 mulching in a greenhouse cucumber cultivation. *Pesquisa Agropecuária Brasileira* 51:869-  
836 879.
- 837 69. Mu L, Liang Y, Zhang C, Wang K, Shi G. 2014. Soil respiration of hot pepper (*Capsicum*  
838 *annuum* L.) under different mulching practices in a greenhouse, including controlling  
839 factors in China. *Acta Agriculturae Scandinavica, Section B-Soil & Plant Science* 64:85-  
840 95.

- 841 70. Chen H, Liu J, Zhang A, Chen J, Cheng G, Sun B, Pi X, Dyck M, Si B, Zhao Y. 2017.  
842 Effects of straw and plastic film mulching on greenhouse gas emissions in Loess Plateau,  
843 China: A field study of 2 consecutive wheat-maize rotation cycles. *Science of The Total*  
844 *Environment* 579:814-824.
- 845 71. Zhang F, Li M, Qi JH, Li FM, Sun GJ. 2015. Plastic Film Mulching Increases Soil  
846 Respiration in Ridge-furrow Maize Management. *Arid Land Research and Management*  
847 29:432-453.

848
